# Supplementary material for: Synthesis of mesoionic triazolones via a formal [3+2] cycloaddition between 4-phenyl-1,2,4-triazoline-3,5-dione and alkynes
Source: Royal Society of Chemistry journal article supplement (doi:10.1039/d3cc05088b), 2024-01-01

Supplementary Information for:

**Synthesis of mesoionic triazolones via a formal [3+2] cycloaddition between 4-phenyl-1,2,4-triazoline-3,5-dione and alkynes**

Yusuke Kuroda,<sup>\*a,b</sup> Maya Krell,<sup>‡a,c</sup> Kazuma Kurokawa<sup>‡a</sup> and Kiyosei Takasu<sup>\*a</sup>

<sup>‡</sup>These authors contributed equally

<sup>a</sup> Graduate School of Pharmaceutical Sciences, Kyoto University Yoshida, Sakyo-ku, Kyoto 606-8501, Japan

<sup>b</sup> Research Foundation ITSUU Laboratory, C1232 Kanagawa Science Park R&D Building, 3-2-1 Sakado, Takatsu-ku, Kawasaki, Kanagawa 213-0012, Japan

<sup>c</sup> Institute of Pharmaceutical Sciences, Department of Chemistry and Applied Biosciences, ETH Zurich, 8093 Zurich, Switzerland

\*Email: [kuroday@pharm.kyoto-u.ac.jp](mailto:kuroday@pharm.kyoto-u.ac.jp) (Y.K.) [takasu.kiyosei.6r@kyoto-u.ac.jp](mailto:takasu.kiyosei.6r@kyoto-u.ac.jp) (K.T.)

Table of Contents

|                                          |    |
|------------------------------------------|----|
| 1. General Considerations .....          | 1  |
| 2. Preparation of Alkynes .....          | 2  |
| 3. Azo-Yne [3+2] Reactions .....         | 6  |
| 4. X-ray Crystallographic Analysis ..... | 14 |
| 5. HOMA/HOMHED Calculations .....        | 16 |
| 6. DFT Calculations .....                | 17 |
| 7. Mechanistic Details .....             | 20 |
| 8. References .....                      | 21 |
| 9. NMR Spectra .....                     | 22 |

## 1. General Considerations

### 1.1. Solvents and Reagents

4-Phenyl-1,2,4-triazole-3,5-dione (PTAD), 1,1,1,3,3,3-hexafluoro-2-propanol (HFIP) and anhydrous  $\text{CH}_2\text{Cl}_2$  were purchased from Tokyo Chemical Industry, Oakwood Chemical and Kanto Chemical respectively and used as received. Unless otherwise noted, all other reagents were purchased from commercial suppliers and used as received.

### 1.2. Experimental Procedures

Unless otherwise noted in the experimental procedures, reactions were carried out in flame or oven-dried glassware under a positive pressure of argon in anhydrous solvents using standard Schlenk techniques. Reaction progresses were monitored using thin-layer chromatography (TLC) on Merck TLC silica gel 60 F254 (0.25 mm) plates. Visualization of the developed plates was performed under UV-light (254 nm) irradiation. Flash column chromatography was performed on Silica gel 60N (Kanto Chemical, particle size 63-210  $\mu\text{m}$ ).

### 1.3. Analytical Instrumentation

NMR data were recorded on a JEOL JNM-LA 500 spectrometers ( $^1\text{H}$  NMR; 500 MHz,  $^{13}\text{C}$  NMR; 126 MHz) or a JEOL JNM ECZ 600R ( $^1\text{H}$  NMR; 600 MHz,  $^{13}\text{C}$  NMR; 151 MHz) typically at 20–23 °C.  $^1\text{H}$  and  $^{13}\text{C}$  NMR spectra were referenced using the residual solvent signal ( $^1\text{H}$  NMR;  $\text{CDCl}_3$  at 7.26 ppm,  $(\text{CD}_3)_2\text{SO}$  at 2.50 ppm,  $^{13}\text{C}$  NMR;  $\text{CDCl}_3$  at 77.16 ppm,  $(\text{CD}_3)_2\text{SO}$  at 39.52 ppm). NMR data are reported as follows: chemical shift, multiplicity (s = singlet, d = doublet, t = triplet, q = quartet, quint = quintet, m = multiplet), coupling constants (Hz), and integration. High-resolution mass spectra were obtained with SHIMADZU LCMS-IT-TOF. Melting points were determined using Yanaco micro melting point apparatus Model MP-500D.

## 2. Preparation of Alkynes

Following alkynes were obtained from Tokyo Chemical Industry (TCI) and used as received:

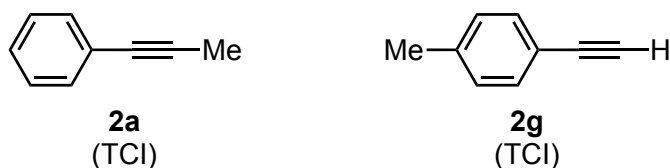

### General Procedure A

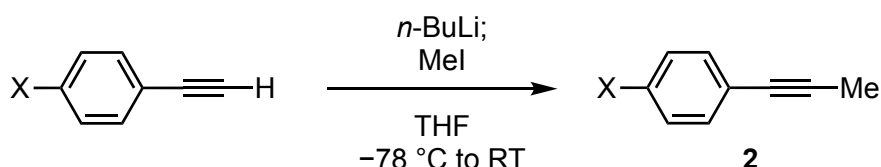

A round-bottom flask charged with a solution of terminal alkyne (1.0 equiv) in THF (0.33 M) was cooled to -78 °C. *n*-BuLi (1.6 M in hexane, 2.0 equiv) was added dropwise, and the resulting solution was allowed to stir for 30 min at -78 °C. To the mixture was added MeI (2.1 equiv), and the resulting mixture was warmed to room temperature. After 12 h, the reaction mixture was quenched with sat. NH<sub>4</sub>Cl aq., and the mixture was partitioned with hexane and H<sub>2</sub>O. The aqueous phase was extracted with hexane (× 2). The combined organic layers were dried over MgSO<sub>4</sub>, filtered and concentrated under reduced pressure. The crude residue was purified by column chromatography to provide alkyne **2**.

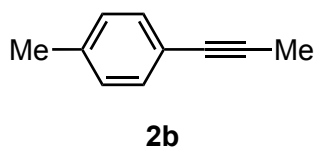

Prepared following the general procedure A using 4-ethynyltoluene (0.620 mL, 5.00 mmol). Purification by column chromatography (SiO<sub>2</sub>, hexanes) afforded **2b** in 75% yield (489 mg) as a colorless oil. Spectral data were in full agreement with the reported literature values.<sup>1</sup>

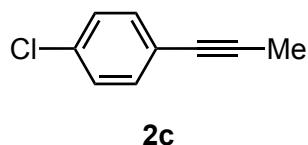

Prepared following the general procedure A using 1-chloro-4-ethynylbenzene (1.00 g, 7.32 mmol). Purification by column chromatography (SiO<sub>2</sub>, hexanes) afforded **2c** in 82% yield (906 mg) as a colorless oil. Spectral data were in full agreement with the reported literature values.<sup>2</sup>

### General Procedure B

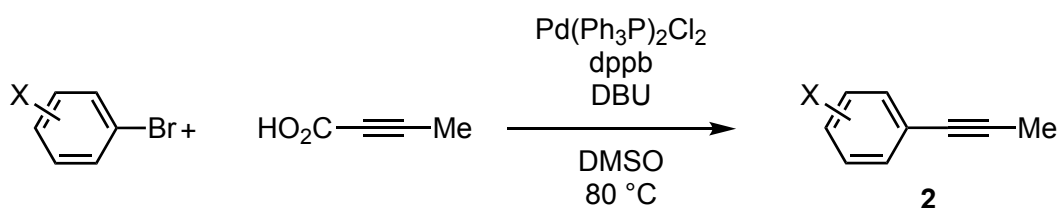

To a round-bottom flask containing a solution of bromoarene (1.0 equiv), 2-butyric acid (1.2 equiv), 1,8-diazabicyclo[5.4.0]undec-7-ene (DBU 3.0 equiv) and 1,4-bis(diphenylphosphino)butane (dppb, 2 mol%) in DMSO (0.33 M) was added Pd(Ph<sub>3</sub>P)<sub>2</sub>Cl<sub>2</sub> (1 mol%). The flask was carefully evacuated and backfilled with argon gas three times, and the resulting mixture was then heated to 80 °C. After 2.5 h, the reaction mixture was quenched with sat. NH<sub>4</sub>Cl aq., and the mixture was partitioned with CHCl<sub>3</sub>. The aqueous phase was extracted with CHCl<sub>3</sub> (× 3). The combined organic layers were washed with H<sub>2</sub>O and brine, dried over MgSO<sub>4</sub>, filtered and concentrated under reduced pressure. The crude residue was purified by column chromatography to provide alkyne **2**.

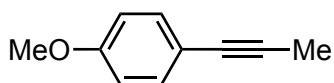

**2d**

Prepared following the general procedure B using 4-bromoanisole (0.370 mL, 2.80 mmol). Purification by column chromatography (SiO<sub>2</sub>, hexanes) afforded **2d** in 86% yield (314 mg) as a colorless oil. Spectral data were in full agreement with the reported literature values.<sup>3</sup>

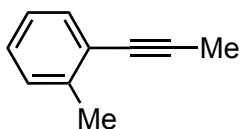

**2e**

Prepared following the general procedure B using 2-bromotoluene (0.360 mL, 3.00 mmol) with the modification that the reaction was conducted at 110 °C for 3 h. Purification by column chromatography (SiO<sub>2</sub>, hexanes) afforded **2e** in 77% yield (302 mg) as a colorless oil. Spectral data were in full agreement with the reported literature values.<sup>4</sup>

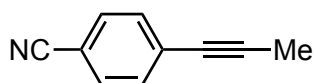

**2f**

Prepared following the general procedure B using 4-bromobenzonitrile (271 mg, 1.50 mmol) with the modification that tetrabutylammonium fluoride (TBAF, 1.0 M in THF, 3.0 equiv) was used as a base instead of DBU, and the reaction was conducted at 110 °C for 2 h. Purification by column chromatography (SiO<sub>2</sub>, hexanes) afforded **2f** in 74% yield (156 mg) as a white solid. Spectral data were in full agreement with the reported literature values.<sup>3</sup>

### General Procedure C

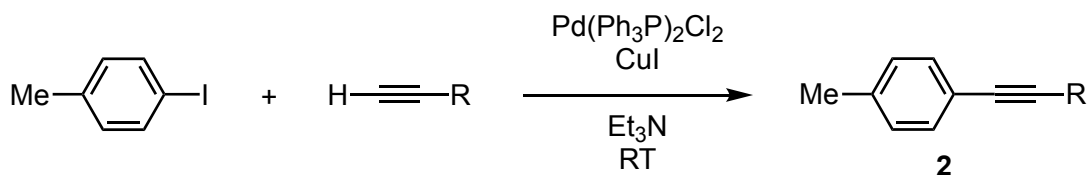

To a round-bottom flask containing a solution of 4-iodotoluene (1.0 equiv) and terminal alkyne (1.2 equiv) in Et<sub>3</sub>N (0.75 M) was added Pd(Ph<sub>3</sub>P)<sub>2</sub>Cl<sub>2</sub> (5 mol%) and CuI (10 mol%). The flask was carefully evacuated and backfilled with argon gas three times, and the resulting mixture was stirred at room temperature. After 23 h, the reaction mixture was filtered through a pad of Celite/SiO<sub>2</sub>, and the filter cake was rinsed with hexanes. The resulting filtrate was then concentrated and purified by column chromatography to provide alkyne **2**.

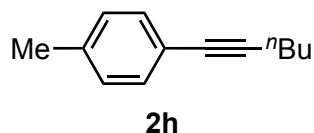

Prepared following the general procedure C using 1-hexyne (0.38 mL, 3.30 mmol). Purification by column chromatography (SiO<sub>2</sub>, hexanes) afforded **2h** in 95% yield (495 mg) as a pale-yellow oil. Spectral data were in full agreement with the reported literature values.<sup>5</sup>

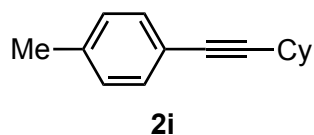

Prepared following the general procedure C using cyclohexylacetylene (1.00 g, 9.24 mmol). Purification by column chromatography (SiO<sub>2</sub>, hexanes) afforded **2i** in 82% yield (1.25 g) as a colorless oil. Spectral data were in full agreement with the reported literature values.<sup>6</sup>

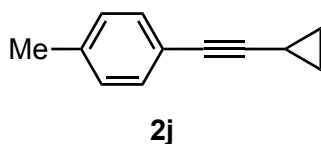

Prepared following the general procedure C using cyclopropylacetylene (0.41 mL, 4.80 mmol). Purification by column chromatography (SiO<sub>2</sub>, hexanes) afforded **2j** in 83% yield (519 mg) as a colorless oil. Spectral data were in full agreement with the reported literature values.<sup>7</sup>

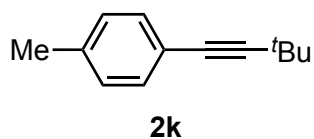

Prepared following the general procedure C using 3,3-dimethyl-1-butyne (1.47 mL, 12.0 mmol). Purification by column chromatography (SiO<sub>2</sub>, hexanes) afforded **2k** in 75% yield (1.28 g) as a colorless oil. Spectral data were in full agreement with the reported literature values.<sup>8</sup>

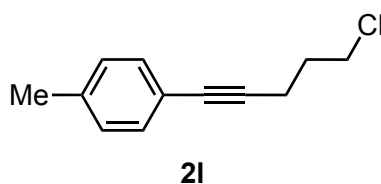

Prepared following the general procedure C using 5-chloro-1-pentyne (0.63 mL, 6.0 mmol). Purification by column chromatography (SiO<sub>2</sub>, 100/0 to 90/10hexanes/EtOAc) afforded **2l** in 69% yield (668 mg) as a pale-yellow oil. Spectral data were in full agreement with the reported literature values.<sup>9</sup>

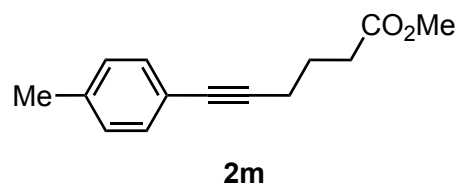

Prepared following the general procedure C using methyl 5-hexynoate (757 mg, 6.00 mmol). Purification by column chromatography (SiO<sub>2</sub>, 95/5 to 85/15 hexanes/EtOAc) afforded **2m** in 77% yield (827 mg) as a pale-yellow oil.

**R<sub>f</sub>**: 0.23 (10/1 hexanes/EtOAc, UV);

**<sup>1</sup>H NMR** (500 MHz, CDCl<sub>3</sub>): δ 7.28 (d, *J* = 8.2 Hz, 2H), 7.09 (d, *J* = 8.2 Hz, 2H), 3.68 (s, 3H), 2.51 (t, *J* = 7.0 Hz, 2H), 2.48 (t, *J* = 7.0 Hz, 2H), 2.33 (s, 3H), 1.93 (quint, *J* = 7.0 Hz, 2H);

**<sup>13</sup>C NMR** (126 MHz, CDCl<sub>3</sub>): δ 173.8, 137.8, 131.5, 129.1, 120.7, 88.1, 81.6, 51.7, 33.0, 24.1, 21.5, 19.0;

**HRMS (ESI)**: Calc'd for C<sub>14</sub>H<sub>16</sub>O<sub>2</sub>Na [M+Na]<sup>+</sup>: 239.1043, found: 239.1035.

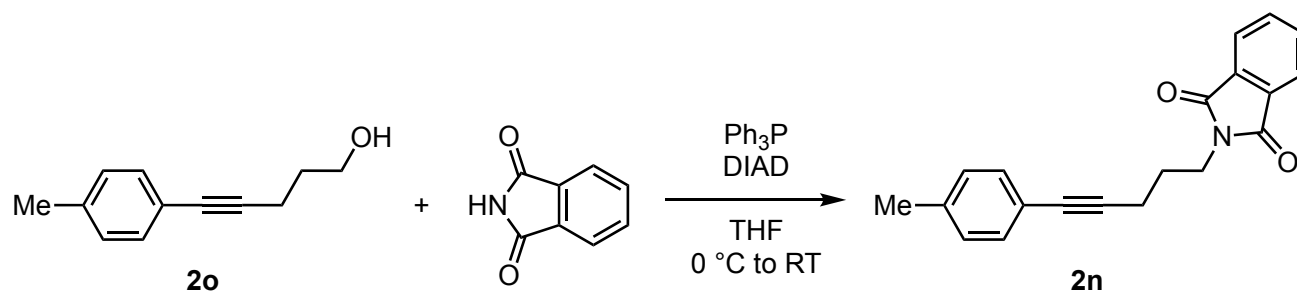

To a round-bottom 50 mL flask containing a solution of **2o** (523 mg, 3.00 mmol, 1.0 equiv), phthalimide (574 mg, 3.90 mmol, 1.3 equiv) and Ph<sub>3</sub>P (1.02 g, 3.90 mmol, 1.3 equiv) in Et<sub>3</sub>N (10 mL) was cooled to 0 °C. Diisopropyl azodicarboxylate (1.9 M solution in toluene, 2.05 mL, 3.90 mmol, 1.3 equiv) was added dropwise over 3 min and the resulting mixture was warmed to room temperature. After 18 h, the solvent was removed under reduced pressure and the residue was purified by column chromatography (SiO<sub>2</sub>, 95/5 to 80/20 hexanes/EtOAc) to provide **2n** as an off-white solid (788 mg, 87%).

**Melting Point**: 113–115 °C;

**R<sub>f</sub>**: 0.49 (5/1 hexanes/EtOAc, UV);

**<sup>1</sup>H NMR** (500 MHz, CDCl<sub>3</sub>): δ 7.82 (dd, *J* = 5.5, 3.0 Hz, 2H), 7.67 (dd, *J* = 5.5, 3.0 Hz, 2H), 7.17 (d, *J* = 8.0 Hz, 2H), 7.03 (d, *J* = 8.0 Hz, 2H), 3.86 (t, *J* = 7.0 Hz, 2H), 2.49 (t, *J* = 7.0 Hz, 2H), 2.31 (s, 3H), 2.01 (quint, *J* = 7.0 Hz, 2H);

**<sup>13</sup>C NMR** (126 MHz, CDCl<sub>3</sub>): δ 168.5, 137.6, 134.0, 132.2, 131.5, 128.9, 123.3, 120.6, 88.0, 81.4, 37.5, 27.6, 21.5, 17.4;

**HRMS (ESI)**: Calc'd for C<sub>20</sub>H<sub>17</sub>NO<sub>2</sub>Na [M+Na]<sup>+</sup>: 326.1152, found: 326.1156.

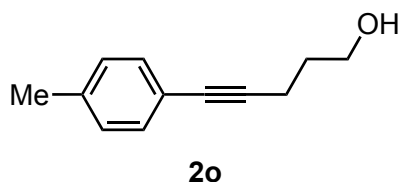

Prepared following the general procedure C using 4-pentyn-1-ol (1.47 mL, 18.0 mmol). Purification by column chromatography (SiO<sub>2</sub>, 95/5 to 85/15 hexanes/EtOAc) afforded **2o** in 90% yield (2.34 g) as a brown solid. Spectral data were in full agreement with the reported literature values.<sup>10</sup>

### 3. Azo-Yne [3+2] Reactions

#### 3-1. General Procedure

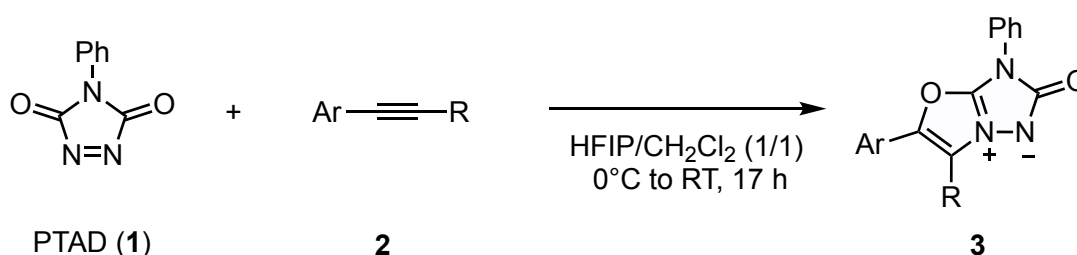

A 4 mL scintillation vial charged with a solution of alkyne **2** (0.40 mmol) in HFIP (0.5 mL) and CH<sub>2</sub>Cl<sub>2</sub> (0.5 mL) was cooled to 0 °C. PTAD (**1**) (35.0 mg, 0.20 mmol) was added, and the resulting mixture was warmed to room temperature (20–23 °C). After 17 h, the solvent was removed under reduced pressure, and the crude residue was purified by column chromatography to provide **3**.

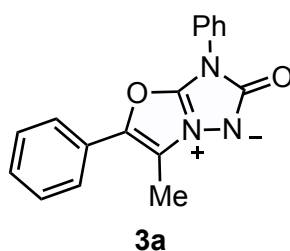

Prepared from PTAD (**1**) (35.0 mg, 0.20 mmol) and **2a** (49 μL, 0.40 mmol) following the general procedure. Purification by column chromatography (SiO<sub>2</sub>, 20/1 CHCl<sub>3</sub>/MeOH) provided **3a** as an off-white solid (43.6 mg, 74%). A single crystal suitable for X-ray crystallographic analysis was grown by slow diffusion of hexanes into a solution of **3a** in EtOAc at room temperature.

**Melting Point:** 165 °C (decomp.);

**R<sub>f</sub>:** 0.24 (EtOAc, UV);

**<sup>1</sup>H NMR** (600 MHz, CDCl<sub>3</sub>): δ 7.85 (d, *J* = 7.4 Hz, 2H), 7.57 (d, *J* = 7.4 Hz, 2H), 7.52–7.48 (m, 4H), 7.42 (t, *J* = 7.4 Hz, 1H), 7.37 (t, *J* = 7.4 Hz, 1H), 2.61 (s, 3H);

**<sup>13</sup>C NMR** (151 MHz, CDCl<sub>3</sub>): δ 158.9, 144.9, 144.0, 132.2, 129.8, 129.6, 129.4, 128.0, 126.3, 125.5, 121.9, 119.0, 8.4;

**HRMS (ESI):** Calc'd for C<sub>17</sub>H<sub>14</sub>N<sub>3</sub>O<sub>2</sub> [M+H]<sup>+</sup>: 292.1081, found: 292.1081.

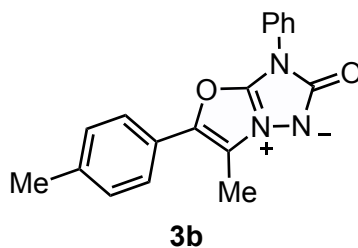

Prepared from PTAD (**1**) (35.0 mg, 0.20 mmol) and **2b** (52.1 mg, 0.40 mmol) following the general procedure. Purification by column chromatography (SiO<sub>2</sub>, 100/0 to 0/100 hexanes/EtOAc) provided **3b** as an off-white solid (43.5 mg, 71%).

**Melting Point:** 155 °C (decomp.);

**R<sub>f</sub>:** 0.28 (EtOAc, UV);

**<sup>1</sup>H NMR** (600 MHz, CDCl<sub>3</sub>): δ 7.86 (d, *J* = 7.6 Hz, 2H), 7.52 (t, *J* = 7.6 Hz, 2H), 7.46 (d, *J* = 8.0 Hz, 2H), 7.38 (t, *J* = 7.6 Hz, 1H), 7.31 (d, *J* = 8.0 Hz, 2H), 2.60 (s, 3H), 2.42 (s, 3H);

**<sup>13</sup>C NMR** (126 MHz, CDCl<sub>3</sub>): δ 158.8, 145.1, 143.8, 139.9, 132.4, 130.0, 129.7, 127.8, 125.5, 123.5, 121.6, 118.3, 21.5, 8.3;

**HRMS (ESI):** Calc'd for C<sub>18</sub>H<sub>16</sub>N<sub>3</sub>O<sub>2</sub> [M+H]<sup>+</sup>: 306.1237, found: 306.1234.

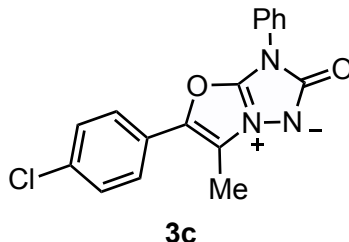

Prepared from PTAD (**1**) (35.0 mg, 0.20 mmol) and **2c** (60.2 mg, 0.40 mmol) following the general procedure. Purification by column chromatography (SiO<sub>2</sub>, 100/0 to 0/100 hexanes/EtOAc) provided **3c** as an off-white solid (70.1 mg, 71%).

**Melting Point:** 148 °C (decomp.);

**R<sub>f</sub>:** 0.25 (EtOAc, UV);

**<sup>1</sup>H NMR** (600 MHz, CDCl<sub>3</sub>): δ 7.84 (d, *J* = 7.8 Hz, 2H), 7.55–7.48 (m, 6H), 7.40 (t, *J* = 7.8 Hz, 1H), 2.63 (s, 3H);

**<sup>13</sup>C NMR** (151 MHz, CDCl<sub>3</sub>): δ 158.7, 144.0, 143.8, 135.6, 132.2, 129.8, 129.7, 128.0, 126.6, 124.9, 121.8, 119.5, 8.4;

**HRMS (ESI):** Calc'd for C<sub>17</sub>H<sub>13</sub>ClN<sub>3</sub>O<sub>2</sub> [M+H]<sup>+</sup>: 326.0691, found: 326.0682.



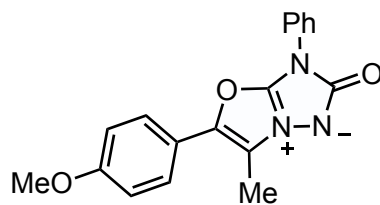

**3d**

Prepared from PTAD (**1**) (35.0 mg, 0.20 mmol) and **2b** (58  $\mu$ L, 0.40 mmol) following the general procedure. Purification by column chromatography (SiO<sub>2</sub>, 100/0 to 20/1 CHCl<sub>3</sub>/MeOH) provided **3d** as a white solid (57.6 mg, 89%).

**Melting Point:** 154 °C (decomp.);

**R<sub>f</sub>:** 0.21 (EtOAc, UV);

**<sup>1</sup>H NMR** (600 MHz, CDCl<sub>3</sub>):  $\delta$  7.86 (d,  $J$  = 8.4 Hz, 2H), 7.54–7.50 (m, 4H), 7.37 (d,  $J$  = 7.6 Hz, 1H), 7.03 (d,  $J$  = 8.4 Hz, 2H), 3.87 (s, 3H), 2.59 (s, 3H);

**<sup>13</sup>C NMR** (151 MHz, CDCl<sub>3</sub>):  $\delta$  160.7, 158.9, 145.1, 143.8, 132.6, 129.8, 127.8, 127.5, 121.7, 118.8, 117.7, 114.9, 55.6, 8.3;

**HRMS (ESI):** Calc'd for C<sub>18</sub>H<sub>16</sub>N<sub>3</sub>O<sub>3</sub> [M+H]<sup>+</sup>: 322.1186, found: 322.1188.

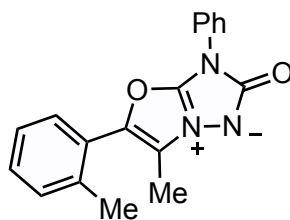

**3e**

Prepared from PTAD (**1**) (35.0 mg, 0.20 mmol) and **2b** (52.1 mg, 0.40 mmol) following the general procedure. Purification by column chromatography (SiO<sub>2</sub>, 100/0 to 0/100 hexanes/EtOAc) provided **3e** as an off-white solid (40.0 mg, 65%).

**Melting Point:** 169 °C (decomp.);

**R<sub>f</sub>:** 0.28 (EtOAc, UV);

**<sup>1</sup>H NMR** (600 MHz, CDCl<sub>3</sub>):  $\delta$  7.85 (d,  $J$  = 7.8 Hz, 2H), 7.49 (t,  $J$  = 7.8 Hz, 2H), 7.44 (t,  $J$  = 7.8 Hz, 1H), 7.37–7.31 (m, 4H), 2.42 (s, 3H), 2.39 (s, 3H);

**<sup>13</sup>C NMR** (151 MHz, CDCl<sub>3</sub>):  $\delta$  158.8, 144.9, 144.3, 138.6, 132.5, 131.2, 131.1, 130.8, 129.6, 127.6, 126.4, 124.6, 121.4, 120.5, 20.3, 7.8;

**HRMS (ESI):** Calc'd for C<sub>18</sub>H<sub>16</sub>N<sub>3</sub>O<sub>2</sub> [M+H]<sup>+</sup>: 306.1237, found: 306.1237.

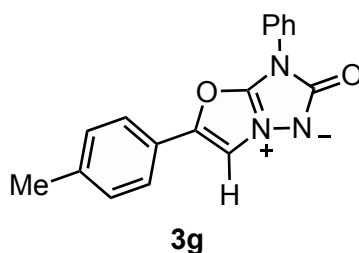

Prepared from PTAD (**1**) (35.0 mg, 0.20 mmol) and **2g** (57  $\mu$ L, 0.40 mmol) following the general procedure. Purification by column chromatography (SiO<sub>2</sub>, 100/0 to 0/100 hexanes/EtOAc) provided **3e** as an off-white solid (40.4 mg, 69%).

**Melting Point:** 195 °C (decomp.);

**R<sub>f</sub>:** 0.30 (EtOAc, UV);

**<sup>1</sup>H NMR** (500 MHz, DMSO-*d*<sub>6</sub>):  $\delta$  8.74 (s, 1H), 7.86 (d, *J* = 7.5 Hz, 2H), 7.63 (d, *J* = 8.0 Hz, 2H), 7.59 (t, *J* = 7.5 Hz, 2H), 7.43 (d, *J* = 7.5 Hz, 1H), 7.34 (d, *J* = 8.0 Hz, 2H), 2.35 (s, 3H);

**<sup>13</sup>C NMR** (151 MHz, DMSO-*d*<sub>6</sub>):  $\delta$  157.9, 148.3, 145.2, 139.1, 132.6, 129.8, 129.4, 127.3, 123.4, 123.3, 121.9, 108.5, 20.9;

**HRMS (ESI):** Calc'd for C<sub>17</sub>H<sub>14</sub>N<sub>3</sub>O<sub>2</sub> [M+H]<sup>+</sup>: 292.1081, found: 292.1083.

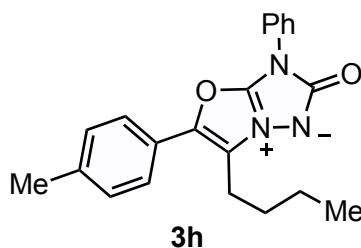

Prepared from PTAD (**1**) (35.0 mg, 0.20 mmol) and **2h** (68.9 mg, 0.40 mmol) following the general procedure. Purification by column chromatography (SiO<sub>2</sub>, 100/0 to 20/1 CHCl<sub>3</sub>/MeOH) provided **3h** as an off-white solid (39.7 mg, 57%).

**Melting Point:** 119 °C (decomp.);

**R<sub>f</sub>:** 0.48 (EtOAc, UV);

**<sup>1</sup>H NMR** (600 MHz, CDCl<sub>3</sub>):  $\delta$  7.86 (d, *J* = 7.8 Hz, 2H), 7.51 (t, *J* = 7.8 Hz, 2H), 7.45 (d, *J* = 7.8 Hz, 2H), 7.37 (t, *J* = 7.8 Hz, 1H), 7.30 (d, *J* = 7.8 Hz, 2H), 2.95 (t, *J* = 7.5 Hz, 2H), 2.42 (s, 3H), 1.87 (quint, *J* = 7.5 Hz, 2H), 1.46 (pent, *J* = 7.5 Hz, 2H), 0.96 (t, *J* = 7.5 Hz, 3H);

**<sup>13</sup>C NMR** (151 MHz, CDCl<sub>3</sub>):  $\delta$  158.8, 144.9, 144.0, 140.1, 132.5, 130.1, 129.7, 127.8, 125.8, 123.5, 122.9, 121.8, 29.1, 22.8, 22.6, 21.5, 13.8;

**HRMS (ESI):** Calc'd for C<sub>21</sub>H<sub>22</sub>N<sub>3</sub>O<sub>2</sub> [M+H]<sup>+</sup>: 348.1707, found: 348.1695.

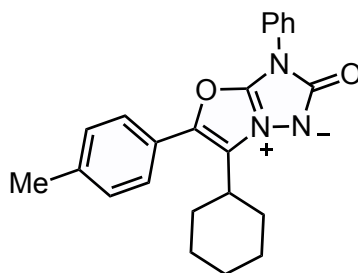

**3i**

Prepared from PTAD (**1**) (35.0 mg, 0.20 mmol) and **2i** (79.3 mg, 0.40 mmol) following the general procedure. Purification by column chromatography (SiO<sub>2</sub>, 100/0 to 0/100 hexanes/EtOAc) provided **3i** as a white solid (60.1 mg, 80%).

**Melting Point:** 186 °C (decomp.);

**R<sub>f</sub>:** 0.60 (EtOAc, UV);

**<sup>1</sup>H NMR** (500 MHz, CDCl<sub>3</sub>): δ 7.86 (d, *J* = 7.8 Hz, 2H), 7.51 (t, *J* = 7.8 Hz, 2H), 7.42 (d, *J* = 8.3 Hz, 2H), 7.37 (t, *J* = 7.8 Hz, 1H), 7.32 (d, *J* = 8.3 Hz, 2H), 3.01 (tt, *J* = 12.5, 3.5 Hz, 1H), 2.44 (s, 3H), 2.26 (qd, *J* = 12.5, 2.9 Hz, 2H), 1.92–1.84 (m, 4H), 1.74 (d, *J* = 12.0 Hz, 1H), 1.47–1.31 (m, 3H);

**<sup>13</sup>C NMR** (126 MHz, CDCl<sub>3</sub>): δ 158.6, 144.5, 143.8, 140.3, 132.5, 130.0, 129.7, 127.7, 127.2, 126.9, 123.6, 121.8, 34.3, 29.4, 26.1, 25.2, 21.6;

**HRMS (ESI):** Calc'd for C<sub>23</sub>H<sub>24</sub>N<sub>3</sub>O<sub>2</sub> [M+H]<sup>+</sup>: 374.1863, found: 374.1869.

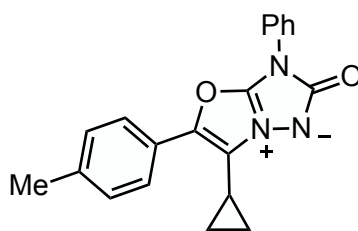

**3j**

Prepared from PTAD (**1**) (35.0 mg, 0.20 mmol) and **2j** (62.6 mg, 0.40 mmol) following the general procedure. Purification by column chromatography (SiO<sub>2</sub>, 100/0 to 25/1 CHCl<sub>3</sub>/MeOH) provided **3j** as a white solid (18.6 mg, 28%).

**Melting Point:** 157 °C (decomp.);

**R<sub>f</sub>:** 0.31 (EtOAc, UV);

**<sup>1</sup>H NMR** (600 MHz, CDCl<sub>3</sub>): δ 7.83 (d, *J* = 7.8 Hz, 2H), 7.58 (d, *J* = 8.1 Hz, 2H), 7.51 (t, *J* = 7.8 Hz, 2H), 7.37 (t, *J* = 7.8 Hz, 1H), 7.30 (d, *J* = 8.1 Hz, 2H), 2.42 (s, 3H), 2.12–2.07 (m, 1H), 1.39 (td, *J* = 5.6, 4.4 Hz, 2H), 1.17 (td, *J* = 7.6, 5.6 Hz, 2H);

**<sup>13</sup>C NMR** (151 MHz, DMSO-*d*<sub>6</sub>): δ 157.7, 144.2, 144.1, 138.6, 132.4, 129.7, 129.4, 127.4, 125.2, 123.9, 122.7, 122.1, 20.9, 5.9, 4.4;

**HRMS (ESI):** Calc'd for C<sub>20</sub>H<sub>18</sub>N<sub>3</sub>O<sub>2</sub> [M+H]<sup>+</sup>: 332.1394, found: 332.1384

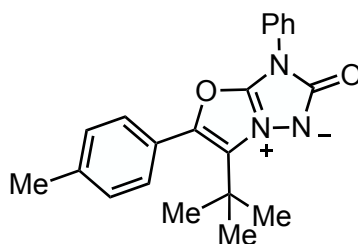

**3k**

Prepared from PTAD (**1**) (35.0 mg, 0.20 mmol) and **2k** (68.9 mg, 0.40 mmol) following the general procedure. Purification by column chromatography (SiO<sub>2</sub>, 100/0 to 0/100 hexanes/EtOAc) provided **3k** as an off-white solid (46.1 mg, 66%).

**Melting Point:** 196 °C (decomp.)

**R<sub>f</sub>:** 0.56 (EtOAc, UV);

**<sup>1</sup>H NMR** (500 MHz, CDCl<sub>3</sub>): δ 7.83–7.81 (m, 2H), 7.47–7.43 (m, 2H), 7.37 (d, *J* = 8.0 Hz, 2H), 7.34–7.28 (m, 3H), 2.43 (s, 3H), 1.40 (s, 9H);

**<sup>13</sup>C NMR** (126 MHz, CDCl<sub>3</sub>): δ 158.5, 144.5, 143.9, 141.7, 132.5, 131.8, 131.7, 129.6, 129.3, 127.6, 124.1, 121.8, 32.0, 28.6, 21.7;

**HRMS (ESI):** Calc'd for C<sub>21</sub>H<sub>22</sub>N<sub>3</sub>O<sub>2</sub> [M+H]<sup>+</sup>: 348.1707, found: 348.1701.

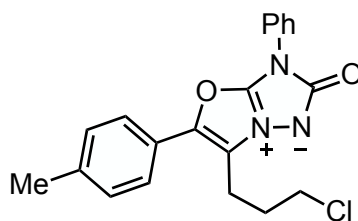

**3l**

Prepared from PTAD (**1**) (35.0 mg, 0.20 mmol) and **2l** (77.1 mg, 0.40 mmol) following the general procedure. Purification by column chromatography (SiO<sub>2</sub>, 100/0 to 20/1 CHCl<sub>3</sub>/MeOH) provided **3l** as an off-white solid (40.1 mg, 55%).

**Melting Point:** 120 °C (decomp.)

**R<sub>f</sub>:** 0.48 (20/1 CHCl<sub>3</sub>/MeOH, UV);

**<sup>1</sup>H NMR** (600 MHz, CDCl<sub>3</sub>): δ 7.86 (d, *J* = 9.0 Hz, 2H), 7.55–7.50 (m, 4H), 7.39 (t, *J* = 7.6 Hz, 1H), 7.33 (d, *J* = 7.6 Hz, 2H), 3.68 (t, *J* = 5.9 Hz, 2H), 3.19 (t, *J* = 7.2 Hz, 2H), 2.46–2.40 (m, 2H), 2.43 (s, 3H);

**<sup>13</sup>C NMR** (151 MHz, CDCl<sub>3</sub>): δ 158.8, 145.6, 144.2, 140.4, 132.4, 130.2, 129.8, 128.0, 126.0, 123.2, 121.9, 121.1, 44.1, 29.3, 21.6, 20.5;

**HRMS (ESI):** Calc'd for C<sub>20</sub>H<sub>18</sub>ClN<sub>3</sub>O<sub>2</sub>Na [M+Na]<sup>+</sup>: 390.0981, found: 390.0991.

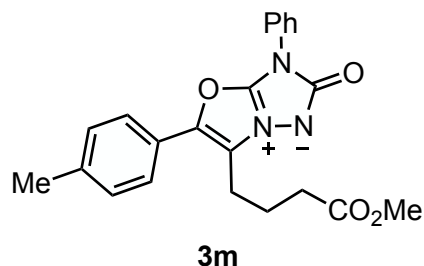

Prepared from PTAD (**1**) (35.0 mg, 0.20 mmol) and **2m** (86.5 mg, 0.40 mmol) following the general procedure. Purification by column chromatography (SiO<sub>2</sub>, 100/0 to 20/1 CHCl<sub>3</sub>/MeOH) provided **3m** as a yellow solid (64.4 mg, 82%).

**Melting Point:** 125 °C (decomp.)

**R<sub>f</sub>:** 0.48 (20/1 CHCl<sub>3</sub>/MeOH, UV);

**<sup>1</sup>H NMR** (500 MHz, CDCl<sub>3</sub>): δ 7.86 (d, *J* = 8.6 Hz, 2H), 7.54–7.49 (m, 4H), 7.39 (t, *J* = 7.0 Hz, 1H), 7.32 (d, *J* = 8.0 Hz, 2H), 3.66 (s, 3H), 3.05 (t, *J* = 7.5 Hz, 2H), 2.49 (t, *J* = 7.5 Hz, 2H), 2.42 (s, 3H), 2.22 (quint, *J* = 7.5 Hz, 2H);

**<sup>13</sup>C NMR** (126 MHz, CDCl<sub>3</sub>): δ 173.1, 158.7, 145.3, 143.9, 140.1, 132.3, 130.0, 129.6, 127.7, 125.7, 123.1, 121.65, 121.60, 51.7, 32.8, 22.11, 22.07, 21.4;

**HRMS (ESI):** Calc'd for C<sub>22</sub>H<sub>22</sub>N<sub>3</sub>O<sub>4</sub> [M+H]<sup>+</sup>: 392.1605, found: 392.1624.

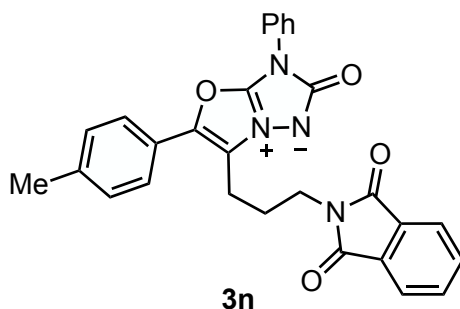

Prepared from PTAD (**1**) (35.0 mg, 0.20 mmol) and **2n** (121 mg, 0.40 mmol) following the general procedure. Purification by column chromatography (SiO<sub>2</sub>, 100/0 to 20/1 CHCl<sub>3</sub>/MeOH) provided **3n** as a yellow solid (74.4 mg, 78%).

**Melting Point:** 190 °C (decomp.)

**R<sub>f</sub>:** 0.48 (20/1 CHCl<sub>3</sub>/MeOH, UV);

**<sup>1</sup>H NMR** (500 MHz, CDCl<sub>3</sub>): δ 7.85–7.79 (m, 4H), 7.71–7.70 (m, 2H), 7.52 (t, *J* = 7.7 Hz, 2H), 7.41–7.36 (m, 3H), 7.22 (d, *J* = 8.3 Hz, 2H), 3.82 (t, *J* = 7.3 Hz, 2H), 3.05 (t, *J* = 7.3 Hz, 2H), 2.38 (s, 3H), 2.30 (quint, *J* = 7.3 Hz, 2H);

**<sup>13</sup>C NMR** (126 MHz, CDCl<sub>3</sub>): δ 168.3, 158.7, 145.3, 144.1, 140.2, 134.1, 132.3, 131.9, 130.0, 129.7, 127.8, 125.9, 123.4, 123.1, 121.8, 121.3, 37.1, 25.7, 21.5, 20.5;

**HRMS (ESI):** Calc'd for C<sub>28</sub>H<sub>22</sub>N<sub>4</sub>O<sub>4</sub>Na [M+Na]<sup>+</sup>: 501.1533, found: 501.1526.

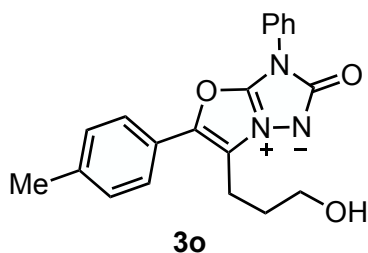

Prepared from PTAD (**1**) (35.0 mg, 0.20 mmol) and **2o** (69.7 mg, 0.40 mmol) following the general procedure. Purification by column chromatography (SiO<sub>2</sub>, 100/0 to 20/1 CHCl<sub>3</sub>/MeOH) provided **3o** as a beige solid (36.6 mg, 52%).

**Melting Point:** 155 °C (decomp.)

**R<sub>f</sub>:** 0.41 (20/1 CHCl<sub>3</sub>/MeOH, UV);

**<sup>1</sup>H NMR** (500 MHz, CDCl<sub>3</sub>): δ 7.85 (d, *J* = 7.5 Hz, 2H), 7.53 (t, *J* = 7.5 Hz, 2H), 7.39 (d, *J* = 7.5 Hz, 2H), 7.39 (t, *J* = 7.5 Hz, 1H), 7.31 (d, *J* = 7.5 Hz, 2H), 3.76 (t, *J* = 6.0 Hz, 2H), 3.43 (brs, 1H), 3.14 (t, *J* = 6.0 Hz, 2H), 2.42 (s, 3H), 2.11 (quint, *J* = 6.0 Hz, 2H);

**<sup>13</sup>C NMR** (126 MHz, CDCl<sub>3</sub>): δ 158.5, 145.4, 143.9, 140.2, 132.3, 130.1, 129.8, 128.0, 125.7, 123.4, 122.3, 121.9, 60.3, 30.4, 21.6, 19.1;

**HRMS (ESI):** Calc'd for C<sub>20</sub>H<sub>19</sub>N<sub>3</sub>O<sub>3</sub>Na [M+Na]<sup>+</sup>: 372.1319, found: 372.1320.

### 3-2. Limitations

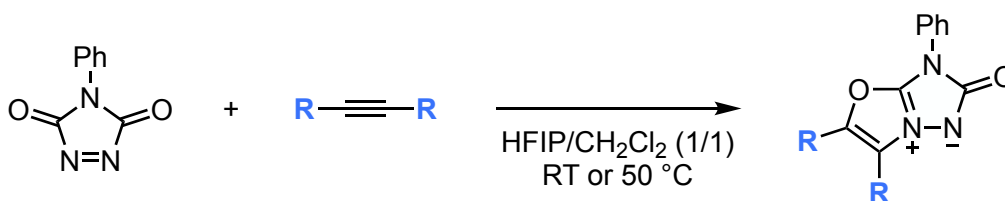

| R            | temp        | results                                      |
|--------------|-------------|----------------------------------------------|
| <i>n</i> -Pr | RT to 50 °C | recovery of alkyne (PTAD was fully consumed) |
| Ph           | RT          | complex mixtures                             |

#### 4. X-ray Crystallographic Analysis

Data collection and Structure solution details: Single crystal X-ray data for **3a** was collected on a Rigaku XtaLaB P200 diffractometer Cu-K $\alpha$  radiation. Data collection, cell refinement, data reduction and analysis were carried out with the CrysAlisPro (Rigaku Oxford Diffraction). These structures were solved by intrinsic phasing methods with the SHELXT program and refined using SHELXL<sup>11–13</sup> with anisotropic displacement parameters for non-H atoms. CCDC 2292795 (for **3a**) contains the supplementary crystallographic data for this paper, which can be obtained free of charge from the Cambridge Crystallographic Data Centre via [http://www.ccdc.cam.ac.uk/data\\_request/cif](http://www.ccdc.cam.ac.uk/data_request/cif)

**Table S1.** Summary of crystallographic data of **3a**

|                                             |                                                               |
|---------------------------------------------|---------------------------------------------------------------|
| Empirical formula                           | C <sub>17</sub> H <sub>14</sub> N <sub>3</sub> O <sub>2</sub> |
| Formula weight                              | 292.31                                                        |
| Temperature/K                               | 100                                                           |
| Crystal system                              | triclinic                                                     |
| Space group                                 | P-1                                                           |
| a/Å                                         | 7.1044(2)                                                     |
| b/Å                                         | 10.0383(3)                                                    |
| c/Å                                         | 10.7169(3)                                                    |
| $\alpha$ /°                                 | 102.103(3)                                                    |
| $\beta$ /°                                  | 109.324(3)                                                    |
| $\gamma$ /°                                 | 102.128(3)                                                    |
| Volume/Å <sup>3</sup>                       | 672.07(4)                                                     |
| Z                                           | 2                                                             |
| $\rho$ calc/g/cm <sup>3</sup>               | 1.444                                                         |
| $\mu$ /mm <sup>-1</sup>                     | 0.793                                                         |
| F(000)                                      | 306.0                                                         |
| Crystal size/mm <sup>3</sup>                | 0.14 × 0.06 × 0.02                                            |
| Radiation                                   | CuK $\alpha$ ( $\lambda$ = 1.54184)                           |
| 2 $\Theta$ range for data collection/°      | 9.174 to 147.38                                               |
| Index ranges                                | -8 ≤ h ≤ 8, -12 ≤ k ≤ 12, -12 ≤ l ≤ 13                        |
| Reflections collected                       | 13502                                                         |
| Independent reflections                     | 2613 [R <sub>int</sub> = 0.0385, R <sub>sigma</sub> = 0.0281] |
| Data/restraints/parameters                  | 2613/0/200                                                    |
| Goodness-of-fit on F <sup>2</sup>           | 1.036                                                         |
| Final R indexes [I ≥ 2 $\sigma$ (I)]        | R <sub>1</sub> = 0.0373, wR <sub>2</sub> = 0.0983             |
| Final R indexes [all data]                  | R <sub>1</sub> = 0.0404, wR <sub>2</sub> = 0.1004             |
| Largest diff. peak/hole / e Å <sup>-3</sup> | 0.19/-0.28                                                    |

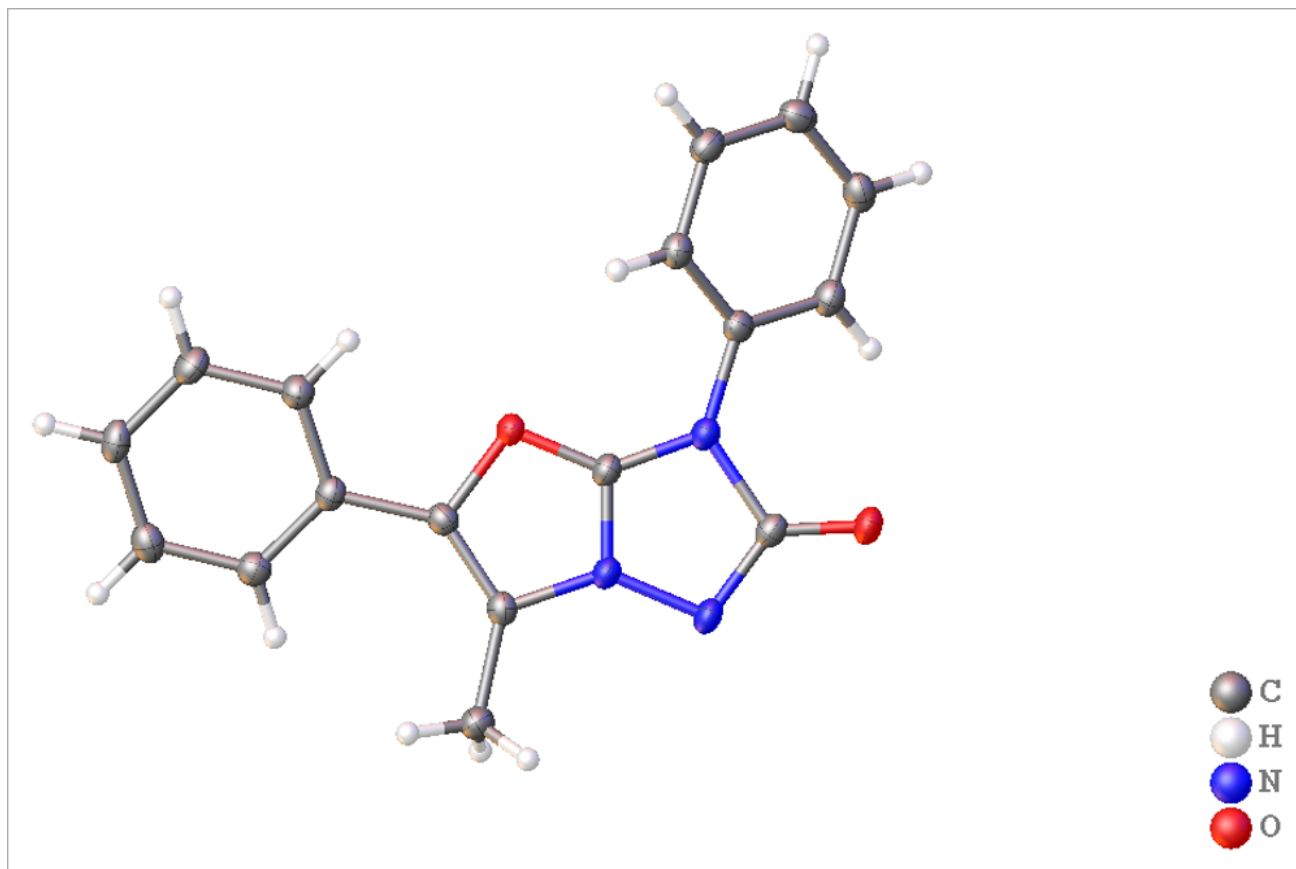

**Figure S1.** X-ray crystallographic structure of **3a**



## 5. HOMA/HOMHED Calculations

Harmonic Oscillator Model of Aromaticity (HOMA)<sup>14</sup> and Harmonic Oscillator Model of Aromaticity for Heterocycle Electron Delocalization (HOMHED)<sup>15</sup> values for **3a** were calculated from a following equation:

HOMHED(HOMA)

$$= 1 - \frac{1}{n} \{ \alpha_{CC} \sum [(R(CC)_{\text{opt}} - R_i)]^2 + \alpha_{CX} \sum [(R(CX)_{\text{opt}} - R_i)]^2 + \alpha_{CY} \sum [(R(CY)_{\text{opt}} - R_i)]^2 + \alpha_{XY} \sum [(R(XY)_{\text{opt}} - R_i)]^2 \}$$

where  $n$  is the number of bonds taken into summation,  $a$  is an empirical constant,  $R_{\text{opt}}$  is an optimal bond length,  $R_i$  is an experimental bond length from X-ray crystallographic structure.

For HOMHED,

$a_{CC} = 78.6$ ,  $a_{CN} = 87.4$ ,  $a_{CO} = 77.2$ ,  $a_{NN} = 78.6$ ,  $R(CC)_{\text{opt}} = 1.387 \text{ \AA}$ ,  $R(CN)_{\text{opt}} = 1.339 \text{ \AA}$ ,  $R(CO)_{\text{opt}} = 1.282 \text{ \AA}$  and  $R(NN)_{\text{opt}} = 1.311 \text{ \AA}$  were used.

For HOMA,

$a_{CC} = 257.7$ ,  $a_{CN} = 93.52$ ,  $a_{CO} = 157.38$ ,  $a_{NN} = 130.33$ ,  $R(CC)_{\text{opt}} = 1.388 \text{ \AA}$ ,  $R(CN)_{\text{opt}} = 1.334 \text{ \AA}$ ,  $R(CO)_{\text{opt}} = 1.265 \text{ \AA}$  and  $R(NN)_{\text{opt}} = 1.309 \text{ \AA}$  were used.

**Table S2.** HOMHED and HOMA values for **3a**

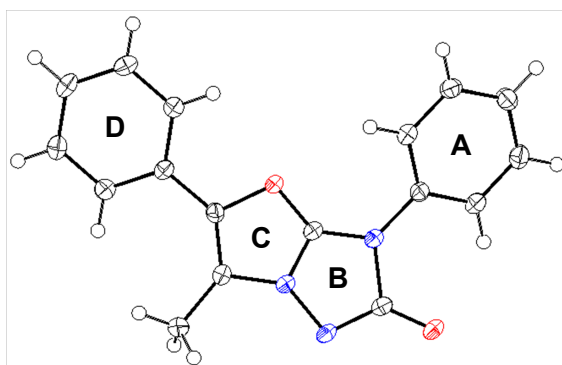

| Ring | HOMHED | HOMA   |
|------|--------|--------|
| A    | 0.999  | 0.997  |
| B    | 0.494  | 0.361  |
| C    | 0.564  | -0.043 |
| D    | 0.996  | 0.989  |

## 6. DFT Calculations

### Computational results

All the calculations were performed using Gaussian 16 program.<sup>16,17</sup> NICS values were calculated using the standard GIAO (GIAO=NMR) at the level of B3LYP/6-311++G(d,p) for the structure optimized at the B3LYP/6-31++G(d,p) theoretical level.

#### Optimized structure for 3a

|   |          |          |          |
|---|----------|----------|----------|
| O | -0.45292 | -0.30253 | 0.03002  |
| O | 3.3325   | 2.48201  | -0.08917 |
| N | 0.02234  | 1.80566  | -0.02878 |
| N | 1.83407  | 0.63093  | -0.00198 |
| N | 1.03464  | 2.82867  | -0.07968 |
| C | -2.91743 | -0.3308  | 0.00789  |
| C | -1.69272 | 0.45225  | 0.00503  |
| C | 0.51666  | 0.60397  | 0.00881  |
| C | -1.37092 | 1.75265  | -0.04595 |
| C | 2.72928  | -0.47553 | 0.04276  |
| C | 2.17823  | 2.11111  | -0.06254 |
| C | 4.0983   | -0.27188 | -0.04927 |
| H | 4.4687   | 0.72251  | -0.14412 |
| C | -2.91902 | -1.60669 | -0.5471  |
| H | -2.01429 | -2.00307 | -0.95864 |
| C | 3.08938  | -2.83948 | 0.21828  |
| H | 2.68948  | -3.82816 | 0.32403  |
| C | -4.08929 | 0.17754  | 0.55674  |
| H | -4.08874 | 1.13895  | 1.02829  |
| C | -4.08082 | -2.35188 | -0.56707 |
| H | -4.07352 | -3.33302 | -0.99744 |
| C | 2.22504  | -1.76257 | 0.17845  |
| H | 1.17118  | -1.92514 | 0.25376  |
| C | -5.25208 | -0.56987 | 0.52311  |
| H | -6.15089 | -0.17018 | 0.94778  |
| C | -5.25181 | -1.83399 | -0.0387  |
| H | -6.15276 | -2.41349 | -0.05822 |
| C | 4.94888  | -1.36093 | -0.00717 |
| H | 6.00523  | -1.19552 | -0.07838 |
| C | 4.45539  | -2.64581 | 0.12519  |
| H | 5.12344  | -3.48279 | 0.15687  |

|   |          |         |          |
|---|----------|---------|----------|
| C | -2.18673 | 2.99544 | -0.13871 |
| H | -2.28991 | 3.45486 | 0.83806  |
| H | -3.1669  | 2.78266 | -0.54003 |
| H | -1.6771  | 3.69871 | -0.78412 |

**Input geometry for NICS(1) calculation of 3a**

|   |             |             |             |
|---|-------------|-------------|-------------|
| O | 0.46690000  | -0.32640000 | -0.02410000 |
| O | -3.29380000 | 2.53860000  | 0.05570000  |
| N | -0.01180000 | 1.81700000  | -0.06940000 |
| N | -1.83290000 | 0.62590000  | -0.00360000 |
| N | -0.96800000 | 2.80480000  | -0.01100000 |
| C | 2.90900000  | -0.35880000 | 0.03200000  |
| C | 1.68010000  | 0.41920000  | 0.00390000  |
| C | -0.50140000 | 0.58580000  | -0.06380000 |
| C | 1.37750000  | 1.75620000  | -0.00110000 |
| C | -2.74650000 | -0.45990000 | -0.04480000 |
| C | -2.14640000 | 2.13400000  | 0.01890000  |
| C | -4.04660000 | -0.29380000 | 0.45170000  |
| H | -4.35120000 | 0.66960000  | 0.83850000  |
| C | 2.91240000  | -1.66500000 | 0.55960000  |
| H | 1.99100000  | -2.09080000 | 0.94220000  |
| C | -3.23910000 | -2.76250000 | -0.59980000 |
| H | -2.91980000 | -3.71510000 | -1.01200000 |
| C | 4.11420000  | 0.17530000  | -0.46420000 |
| H | 4.12540000  | 1.16070000  | -0.91720000 |
| C | 4.09160000  | -2.40670000 | 0.59840000  |
| H | 4.07690000  | -3.41210000 | 1.00870000  |
| C | -2.34280000 | -1.69360000 | -0.57770000 |
| H | -1.34120000 | -1.81980000 | -0.97490000 |
| C | 5.29260000  | -0.56820000 | -0.40740000 |
| H | 6.21280000  | -0.14130000 | -0.79500000 |
| C | 5.28810000  | -1.86120000 | 0.12310000  |
| H | 6.20570000  | -2.44030000 | 0.15910000  |
| C | -4.93210000 | -1.37190000 | 0.41220000  |
| H | -5.93980000 | -1.23940000 | 0.79450000  |
| C | -4.53730000 | -2.60760000 | -0.10710000 |
| H | -5.23380000 | -3.44010000 | -0.13050000 |
| C | 2.20300000  | 2.99280000  | 0.08330000  |

|    |             |             |             |
|----|-------------|-------------|-------------|
| H  | 2.35330000  | 3.44230000  | -0.90520000 |
| H  | 3.17890000  | 2.77790000  | 0.52200000  |
| H  | 1.68700000  | 3.73190000  | 0.70290000  |
| Bq | 4.10130000  | -1.11410000 | 0.07360000  |
| Bq | 4.29740000  | -0.74250000 | 0.98100000  |
| Bq | 3.90020000  | -1.48130000 | -0.83460000 |
| Bq | 0.60230000  | 0.85040000  | -0.03090000 |
| Bq | 0.63090000  | 0.84130000  | -1.03040000 |
| Bq | 0.57360000  | 0.85940000  | 0.96860000  |
| Bq | -1.09210000 | 1.59350000  | -0.02580000 |
| Bq | -1.05330000 | 1.58670000  | 0.97340000  |
| Bq | -1.12640000 | 1.60920000  | -1.02510000 |
| Bq | -3.64070000 | -1.53150000 | -0.07760000 |
| Bq | -3.95480000 | -1.24940000 | -0.98410000 |
| Bq | -3.32670000 | -1.81370000 | 0.82890000  |

## 7. Mechanistic Details

We currently believe our PTAD-alkyne [3+2] cycloaddition takes place in a stepwise manner based on the following 2 reasons. First, the frontier molecular orbital analysis revealed that the calculated HOMO of alkynes and the LUMO of PTAD are mismatched to form new  $\sigma$ -bonds simultaneously as shown below (calculated at B3LYP/6-311++G(d,p) level of theory). Second, literature survey revealed that there are several precedents documenting the formation of vinyl cation intermediates that are stabilized by HFIP.<sup>18</sup>

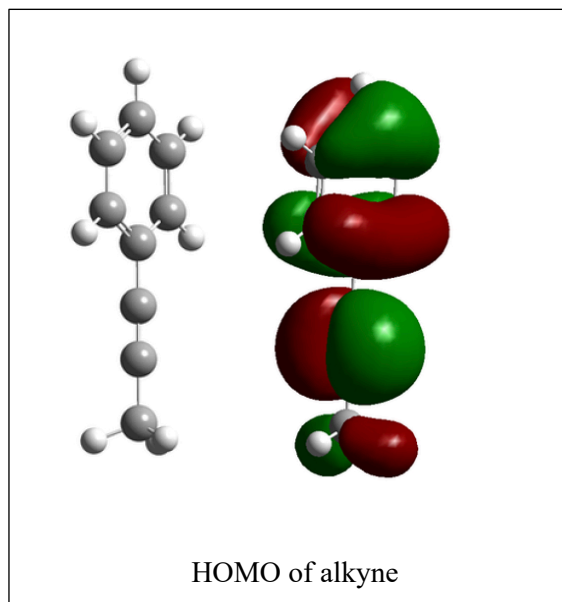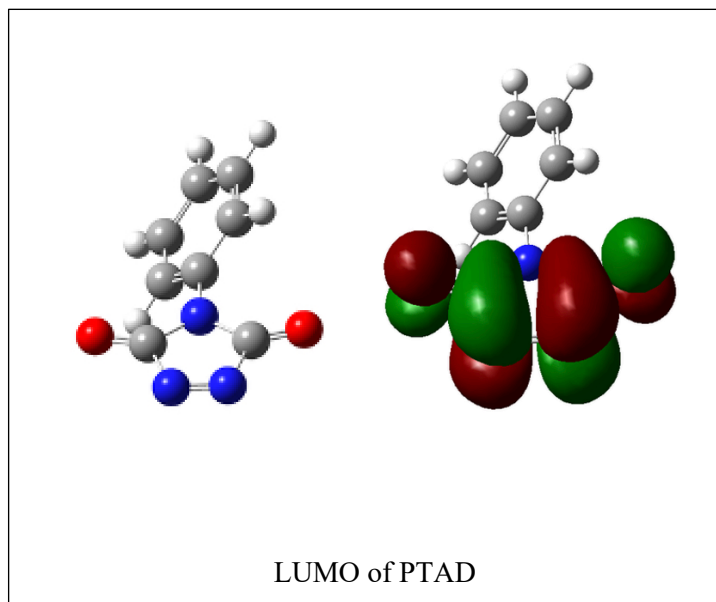

## 8. References

- 1) A. M. Haydl, L. J. Hilpert and B. Breit, *Chem. Eur. J.*, 2016, **22**, 6547–6551.
- 2) F. Wech and U. Gellrich, *ACS Catal.*, 2022, **12**, 5388–5396.
- 3) Y. Okuno, M. Yamashita and K. Nozaki, *Eur. J. Org. Chem.*, 2011, 3951–3958.
- 4) L. Pfeifer and V. Gouverneur, *Org. Lett.*, 2018, **20**, 1576–1579.
- 5) J. Zhang, X. Li, T. Li, G. Zhang, K. Wan, Y. Ma, R. Fang, R. Szostak and M. Szostak, *ACS Catal.*, 2022, **12**, 15323–15333.
- 6) A. Hazra, M. T. Lee, J. F. Chiu and G. Lalic, *Angew. Chem. Int. Ed.*, 2018, **57**, 5492–5496.
- 7) S. Ye and Z.-X. Yu, *Org. Lett.*, 2010, **12**, 804–807.
- 8) L.-W. Qian, M. Sun, J. Dong, Q. Xu, Y. Zhou and S.-F. Yin, *J. Org. Chem.*, 2017, **82**, 6764–6769.
- 9) Z. Li, Y. Dong, M. Häußler, J. W. Y. Lam, Y. Dong, L. Wu, K. S. Wong and B. Z. Tang, *J. Phys. Chem. B*, 2006, **110**, 2302–2309.
- 10) K. M. Gericke, D. I. Chai and M. Lautens, *Tetrahedron*, 2008, **64**, 6002–6014.
- 11) G. M. Sheldrick, *Acta Cryst.* 2008, **A64**, 112–122.
- 12) G. M. Sheldrick, *Acta Cryst.* 2016, **A71**, 3–8.
- 13) G. M. Sheldrick, *Acta Cryst.* 2015, **C71**, 3–8.
- 14) J. Kruszewski and T. M. Krygowski, *Tetrahedron Lett.*, 1972, **13**, 3839–3842.
- 15) C. P. Frizzo and M. A. P. Martins, *Struct. Chem.*, 2012, **23**, 375–380.
- 16) Gaussian 16, Revision C.01, M. J. Frisch, G. W. Trucks, H. B. Schlegel, G. E. Scuseria, M. A. Robb, J. R. Cheeseman, G. Scalmani, V. Barone, G. A. Petersson, H. Nakatsuji, X. Li, M. Caricato, A. V. Marenich, J. Bloino, B. G. Janesko, R. Gomperts, B. Mennucci, H. P. Hratchian, J. V. Ortiz, A. F. Izmaylov, J. L. Sonnenberg, D. Williams-Young, F. Ding, F. Lipparini, F. Egidi, J. Goings, B. Peng, A. Petrone, T. Henderson, D. Ranasinghe, V. G. Zakrzewski, J. Gao, N. Rega, G. Zheng, W. Liang, M. Hada, M. Ehara, K. Toyota, R. Fukuda, J. Hasegawa, M. Ishida, T. Nakajima, Y. Honda, O. Kitao, H. Nakai, T. Vreven, K. Throssell, J. A. Montgomery, Jr., J. E. Peralta, F. Ogliaro, M. J. Bearpark, J. J. Heyd, E. N. Brothers, K. N. Kudin, V. N. Staroverov, T. A. Keith, R. Kobayashi, J. Normand, K. Raghavachari, A. P. Rendell, J. C. Burant, S. S. Iyengar, J. Tomasi, M. Cossi, J. M. Millam, M. Klene, C. Adamo, R. Cammi, J. W. Ochterski, R. L. Martin, K. Morokuma, O. Farkas, J. B. Foresman and D. J. Fox, Gaussian, Inc., Wallingford CT, 2019.
- 17) NBO Version 3.1, E. D. Glendening, A. E. Reed, J. E. Carpenter and F. Weinhold.
- 18) a) I. Takahashi, T. Fujita, N. Shoji and J. Ichikawa, *Chem. Commun.*, 2019, **55**, 9267. b) P. Alonso, R. Fontaneda, P. Pardo, F. J. Fañanás and F. Rodríguez, *Org. Lett.*, 2018, **20**, 1659.

## 9. NMR Spectra

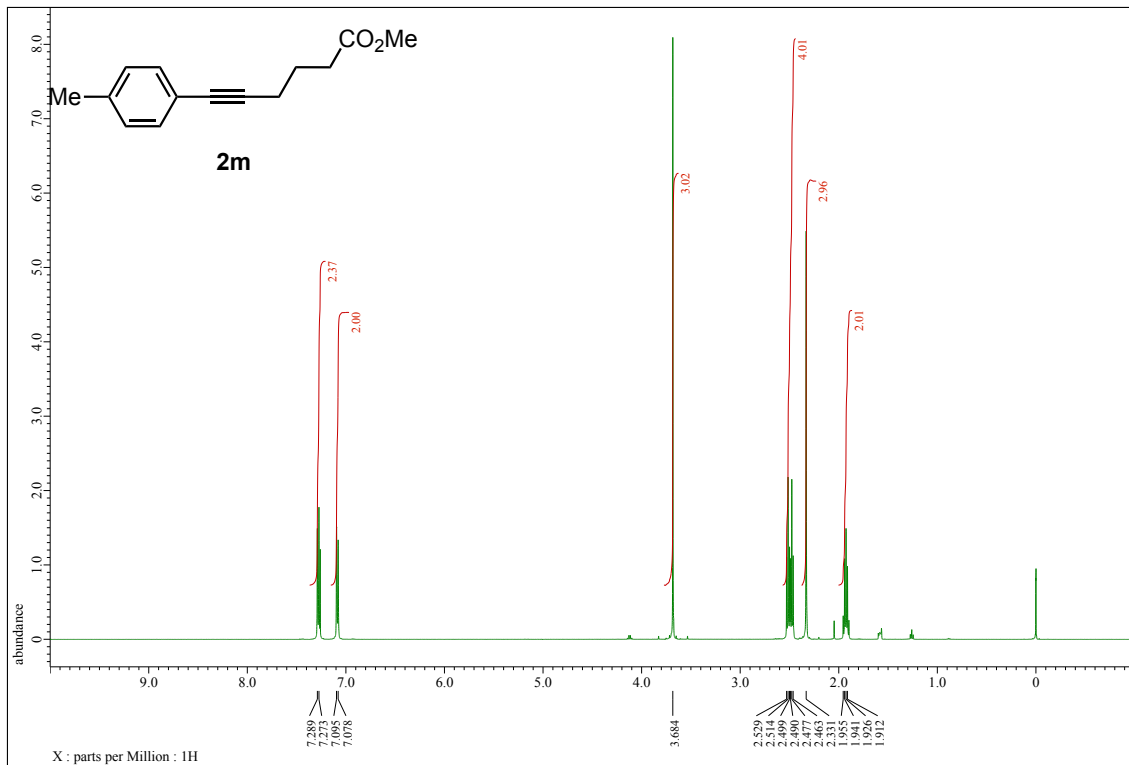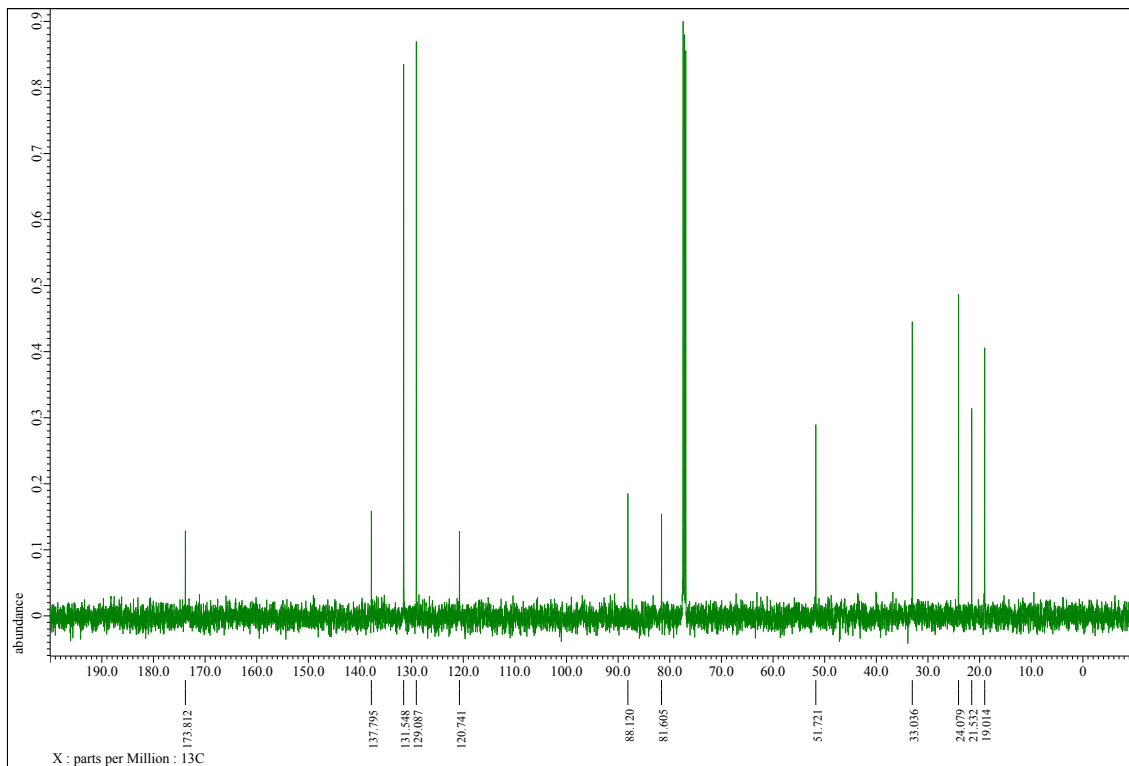

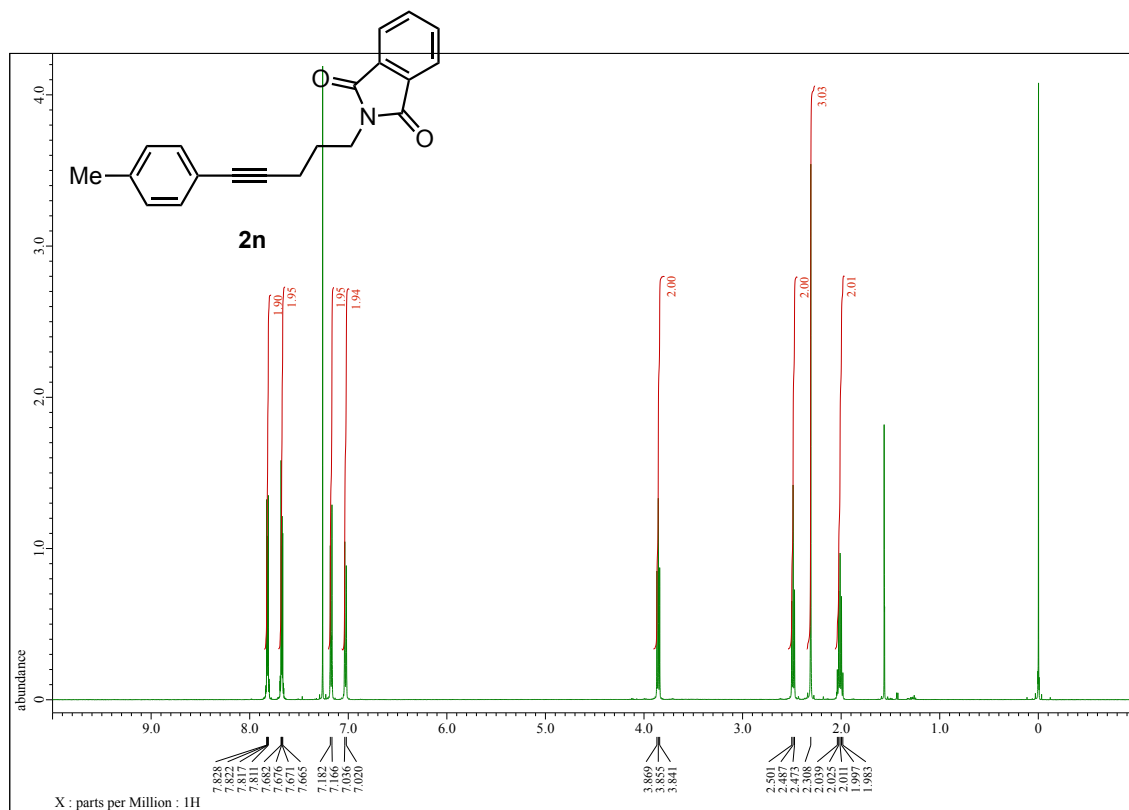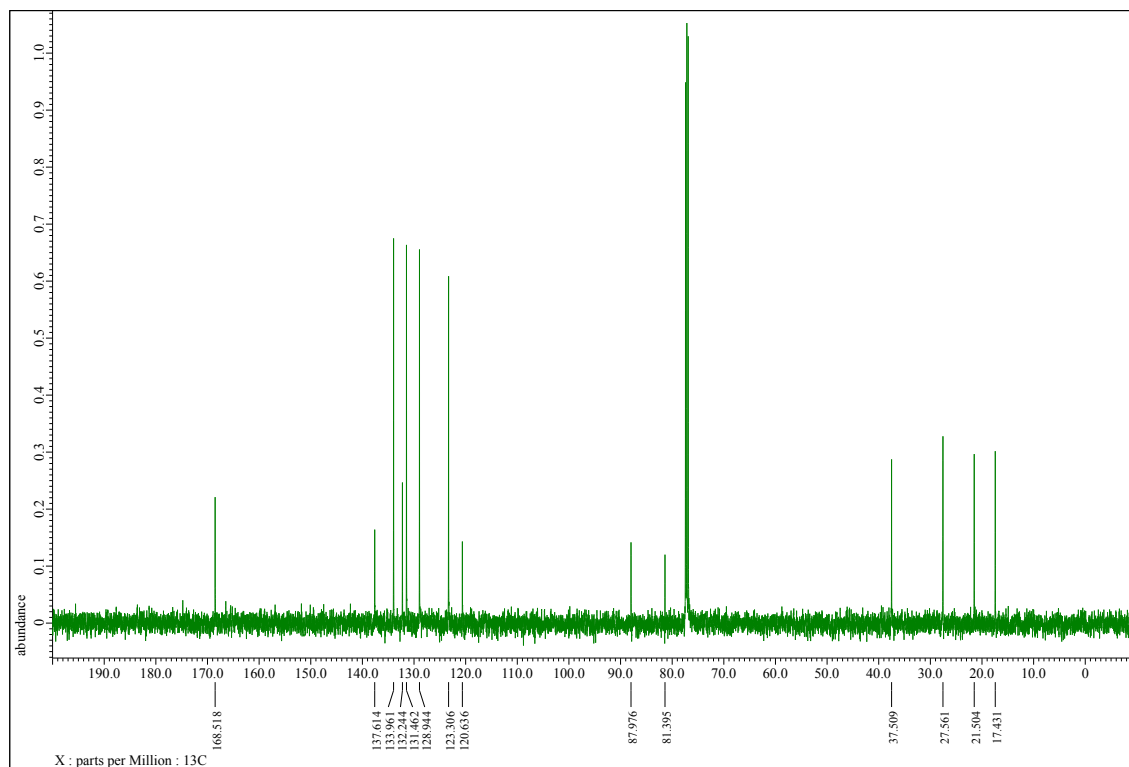



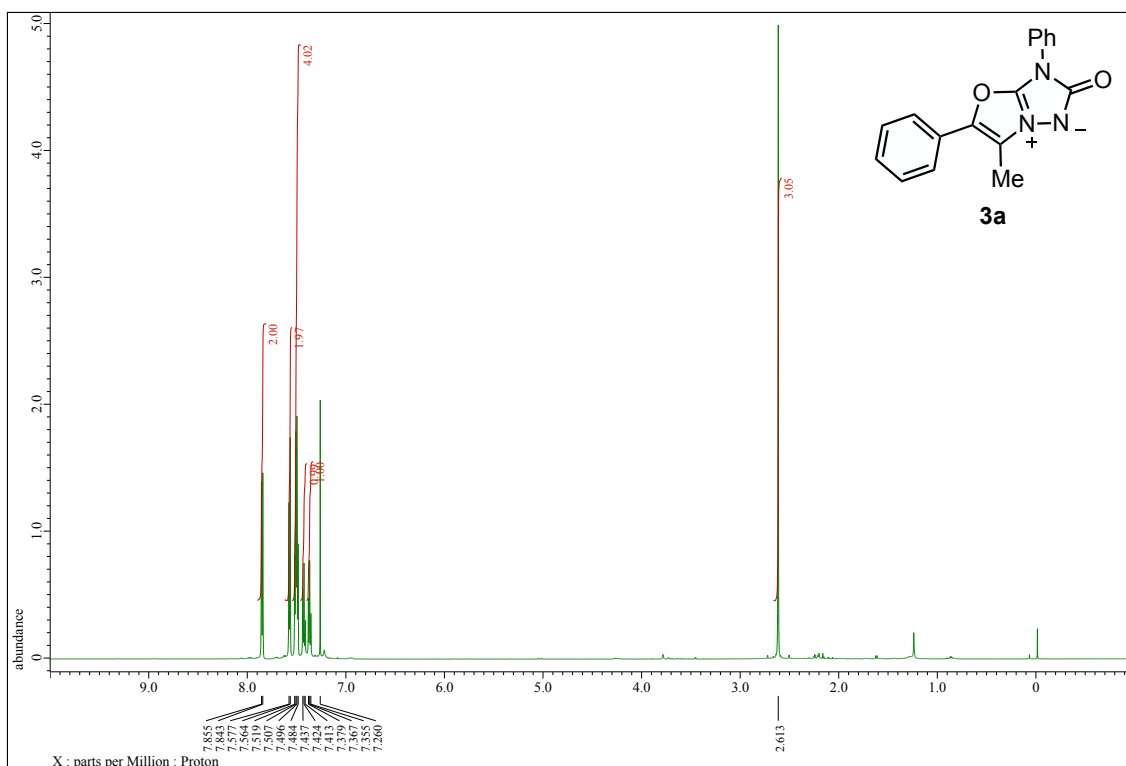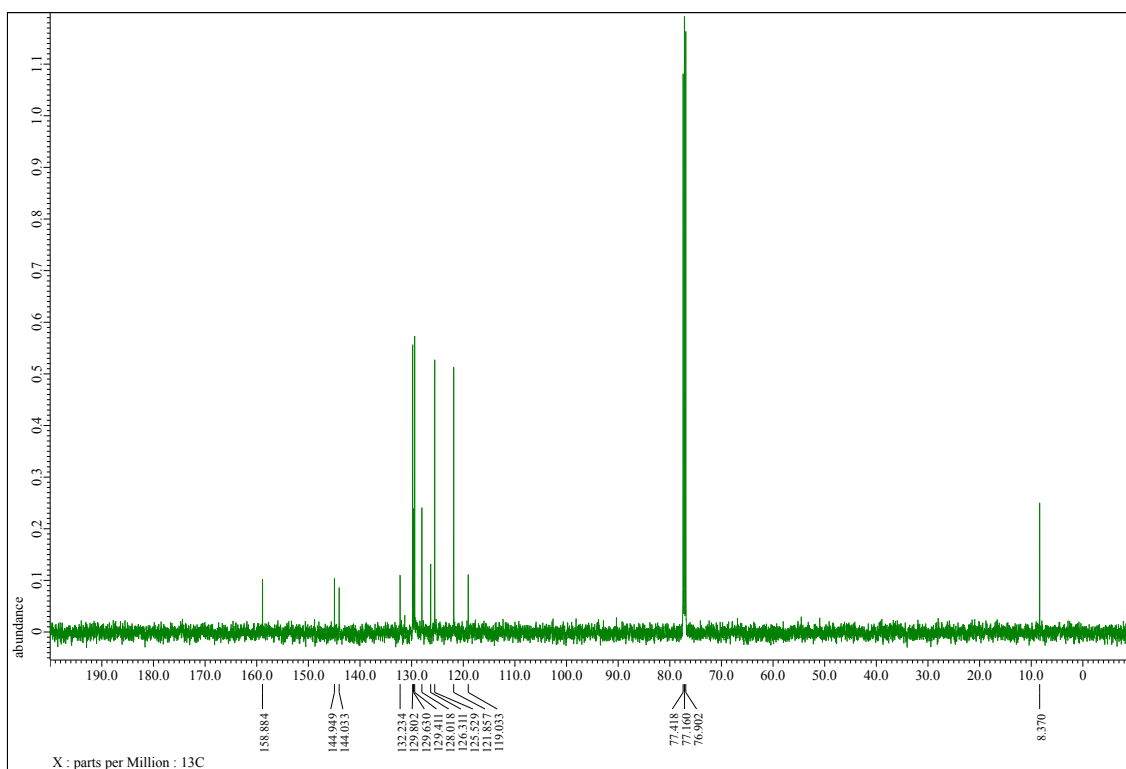

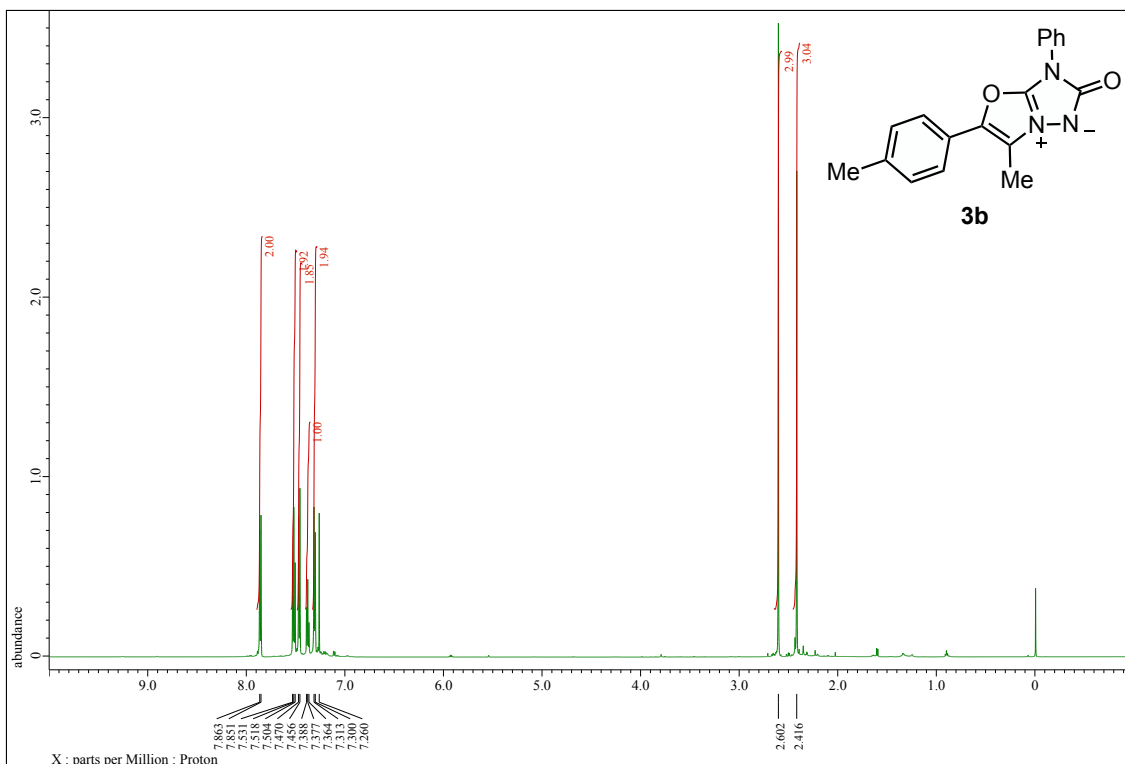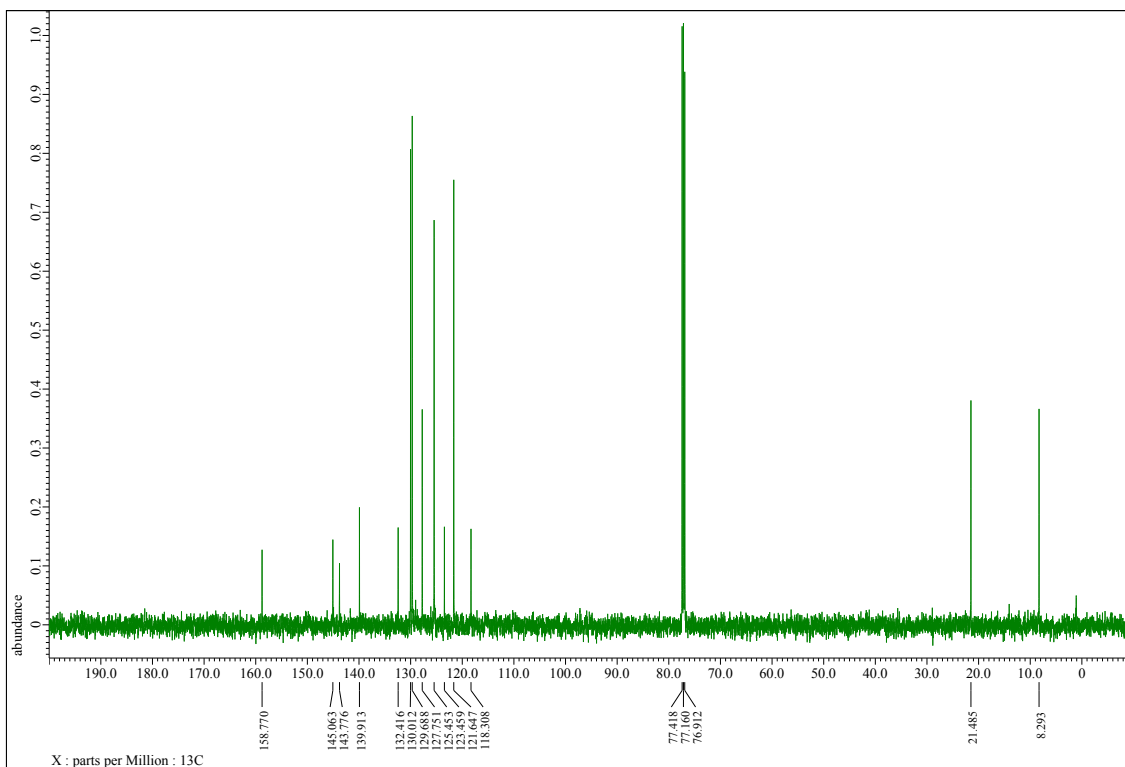

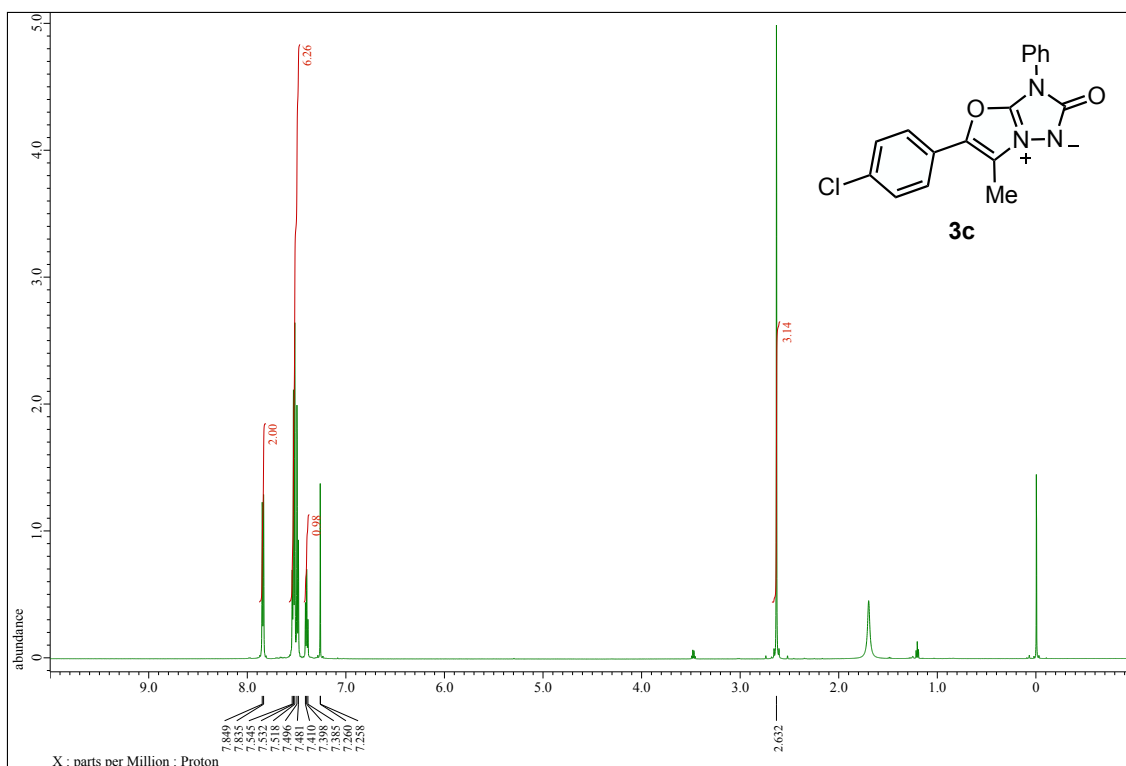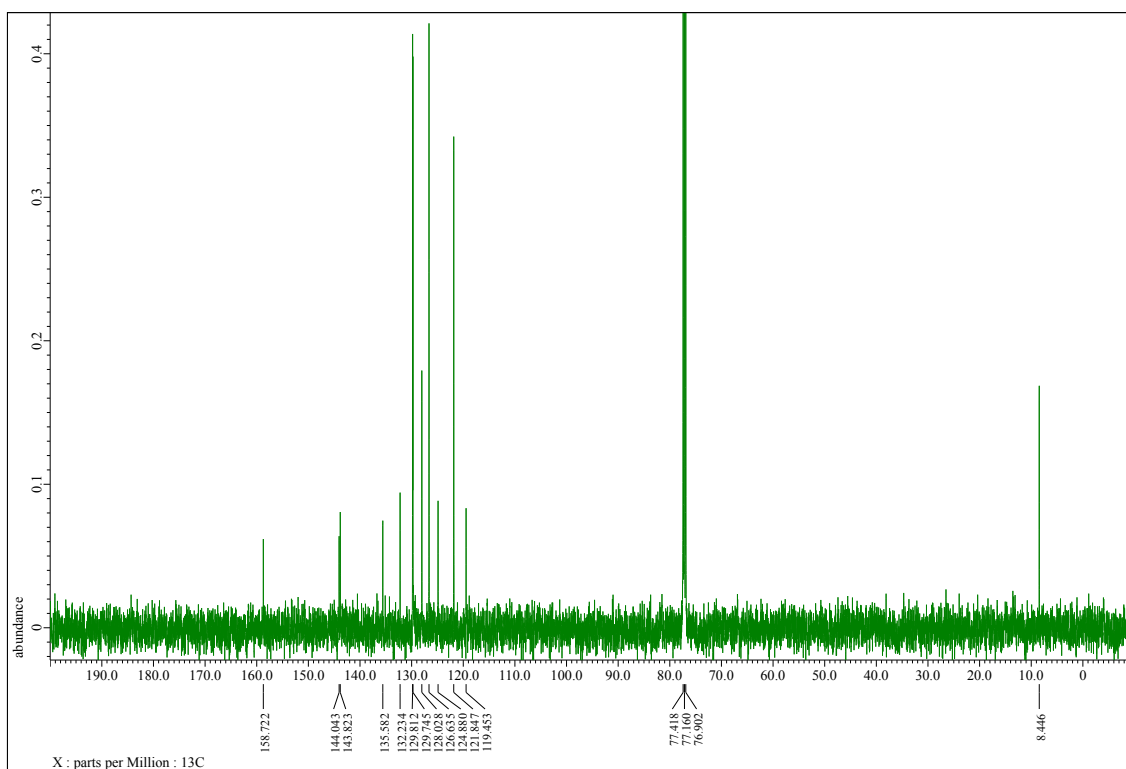

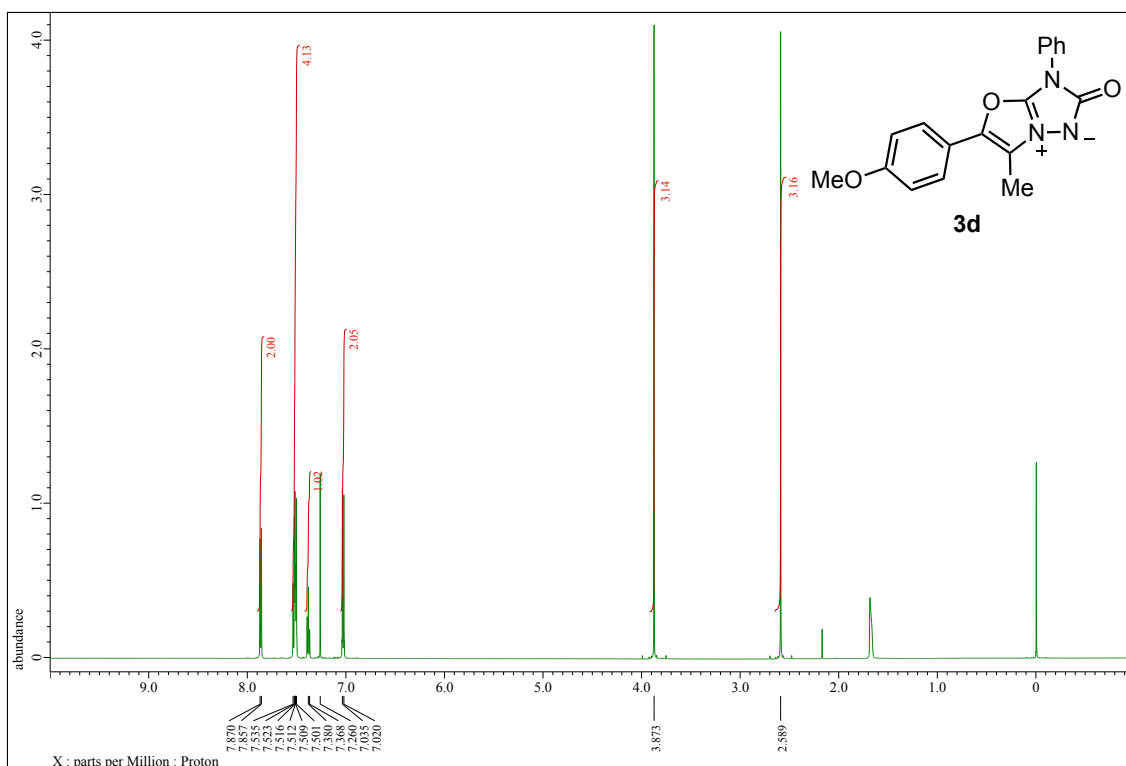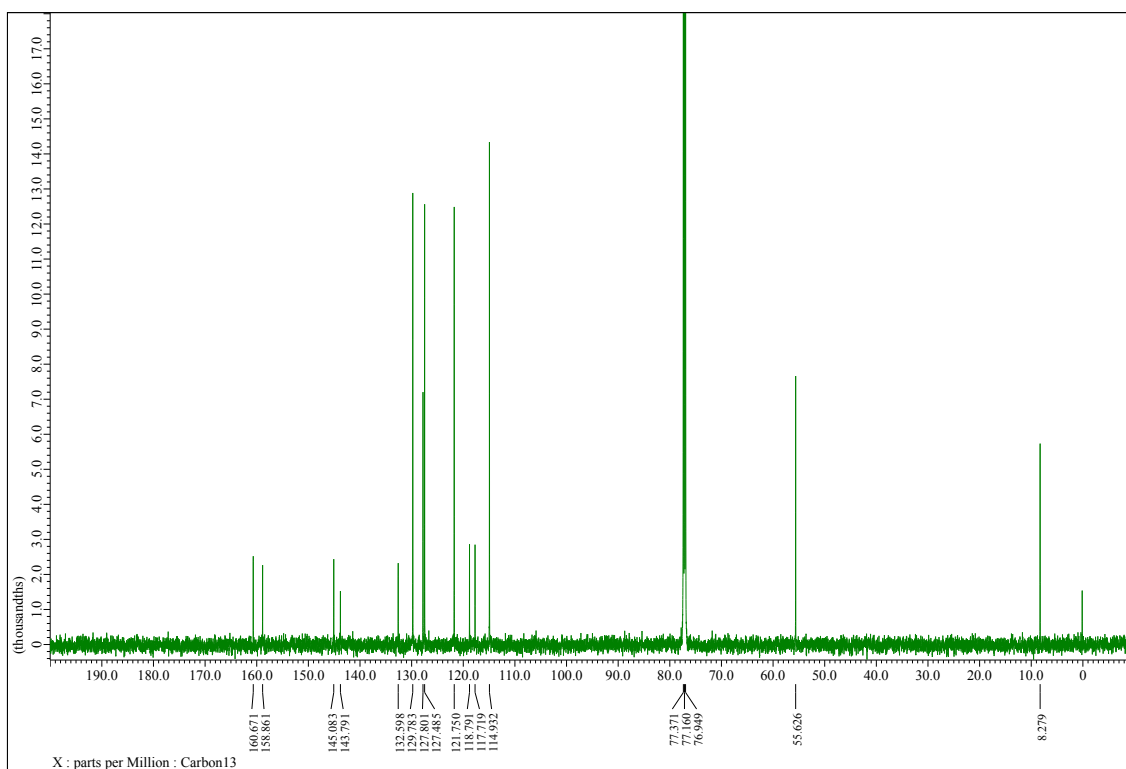

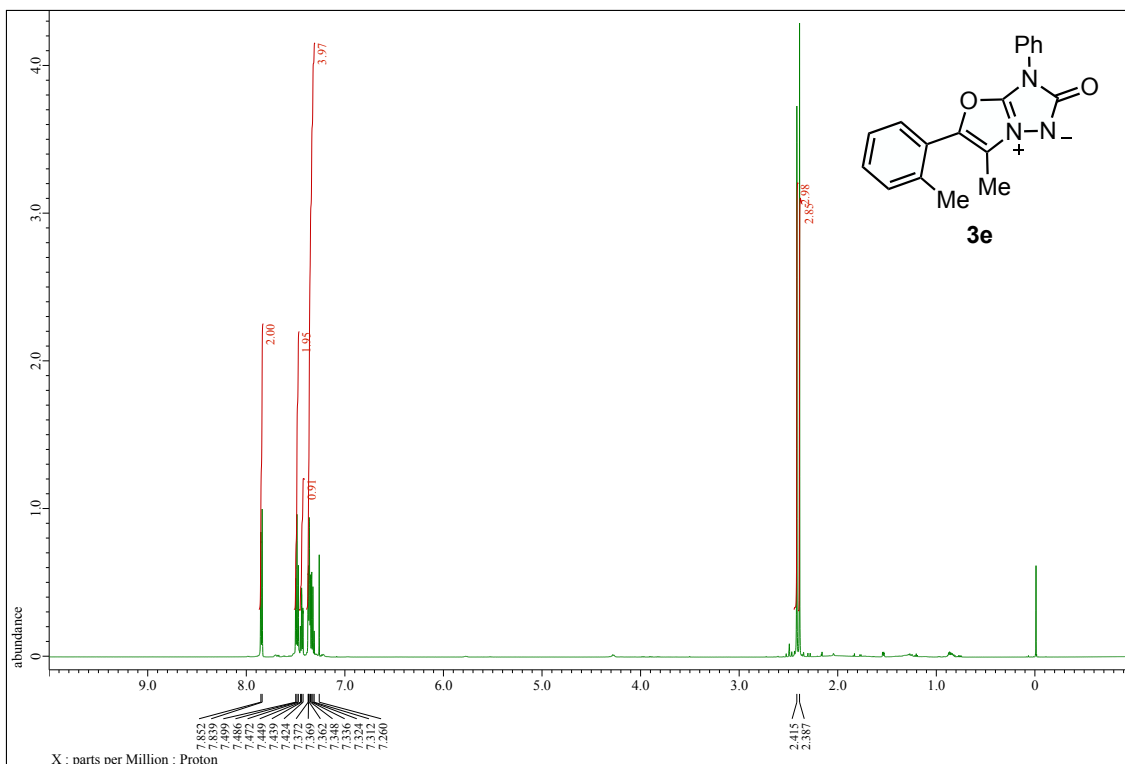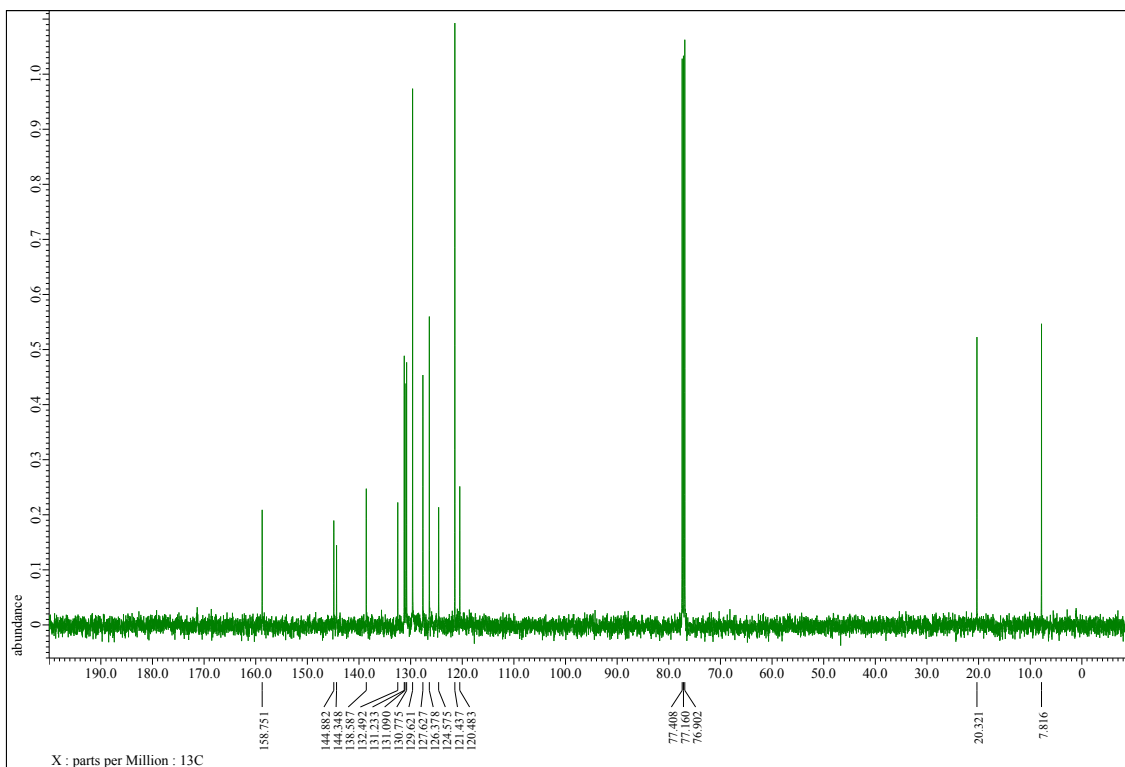

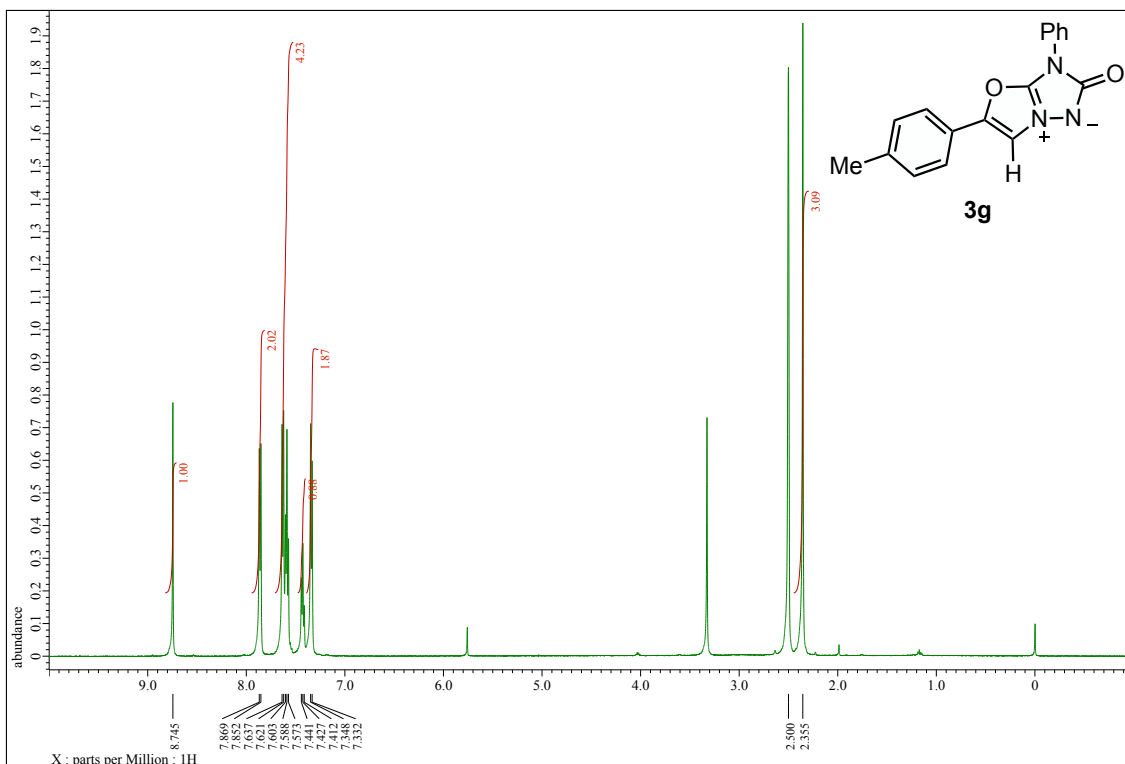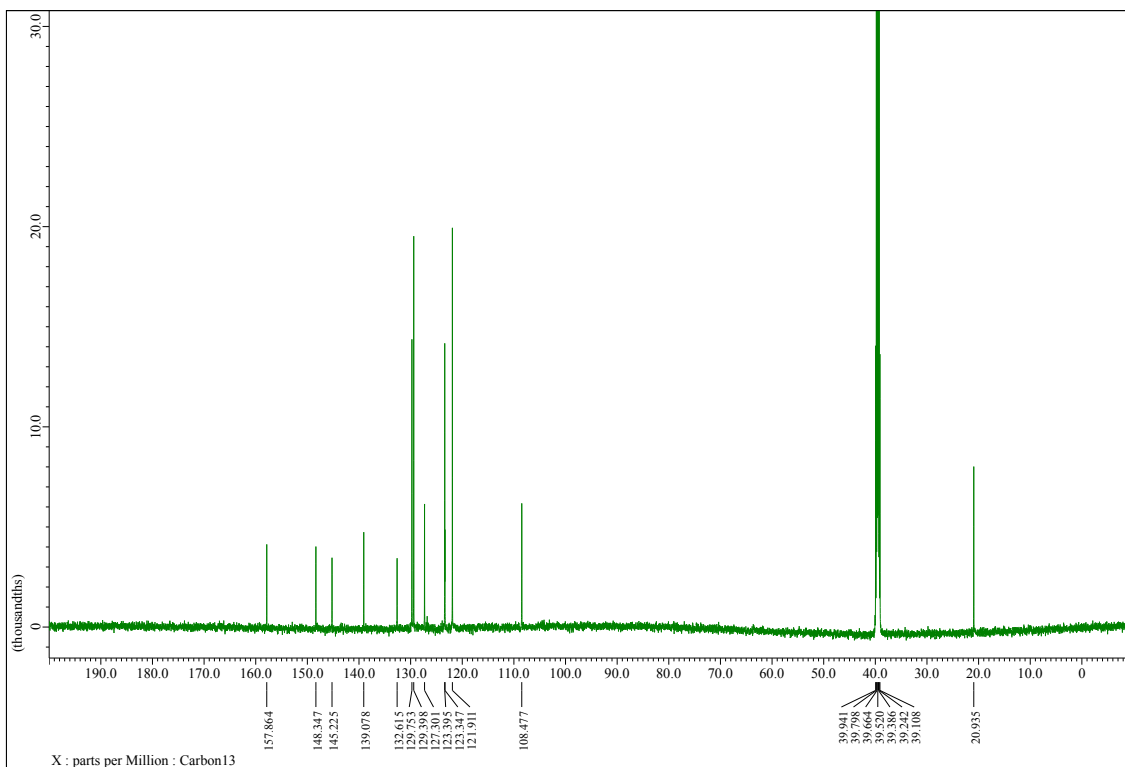

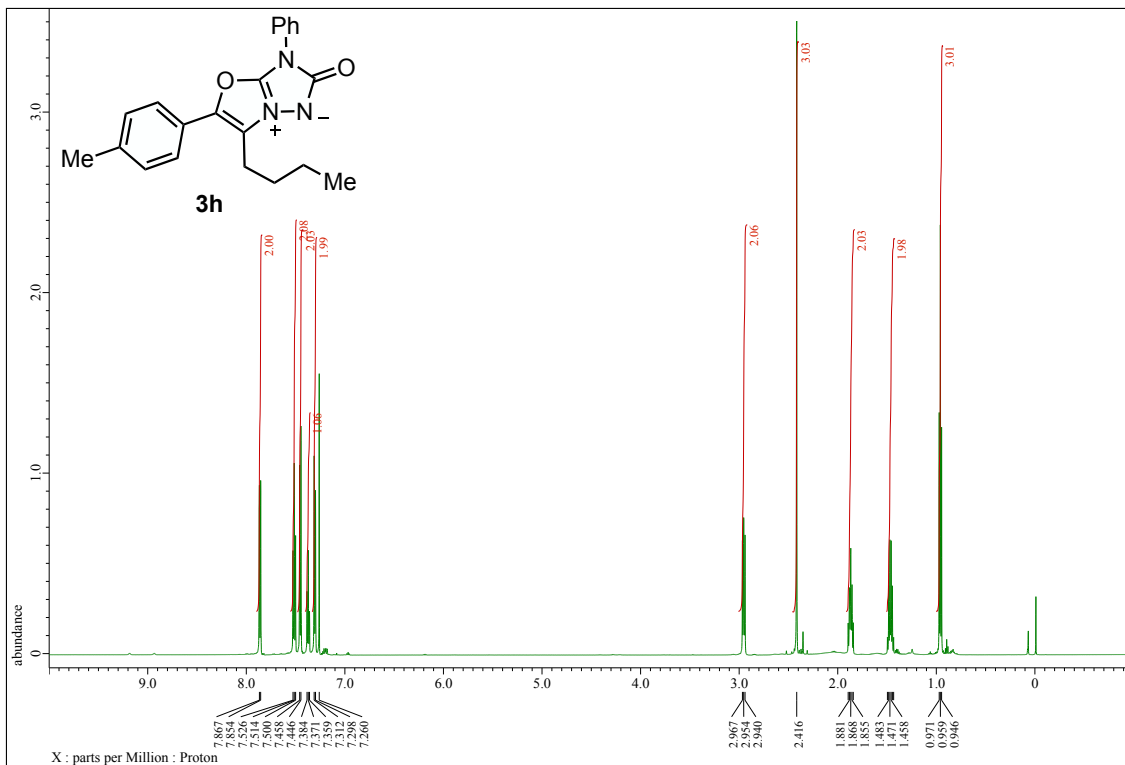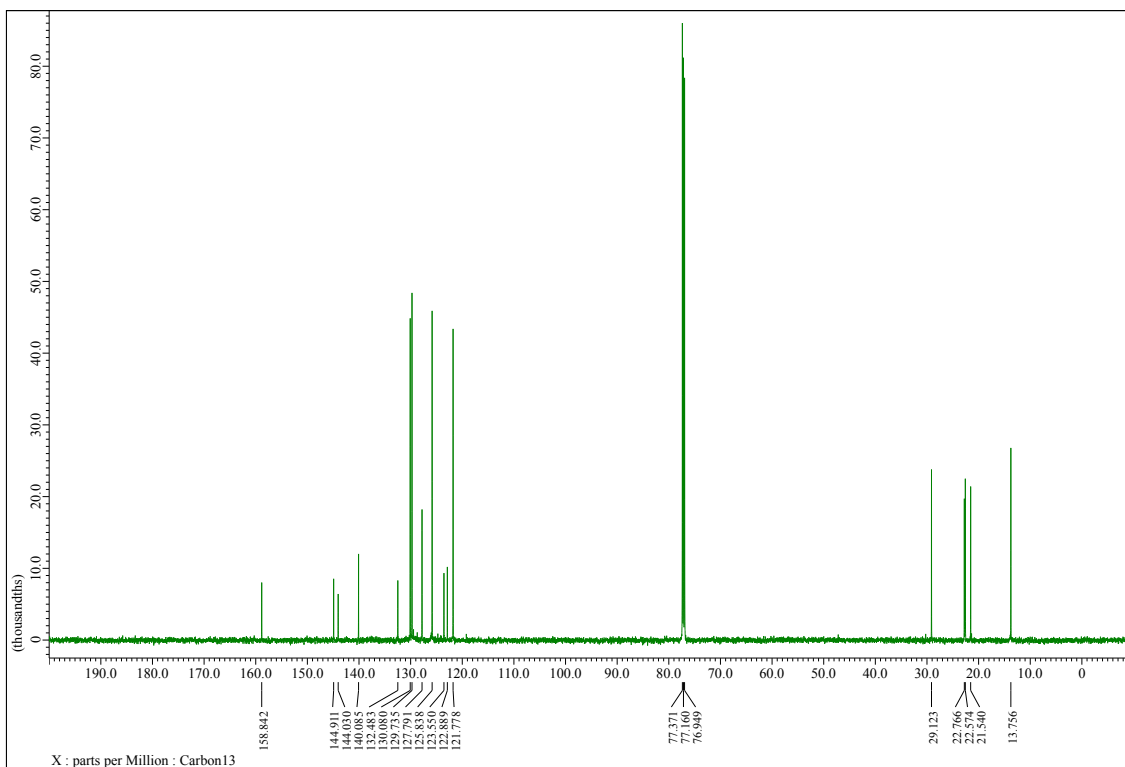

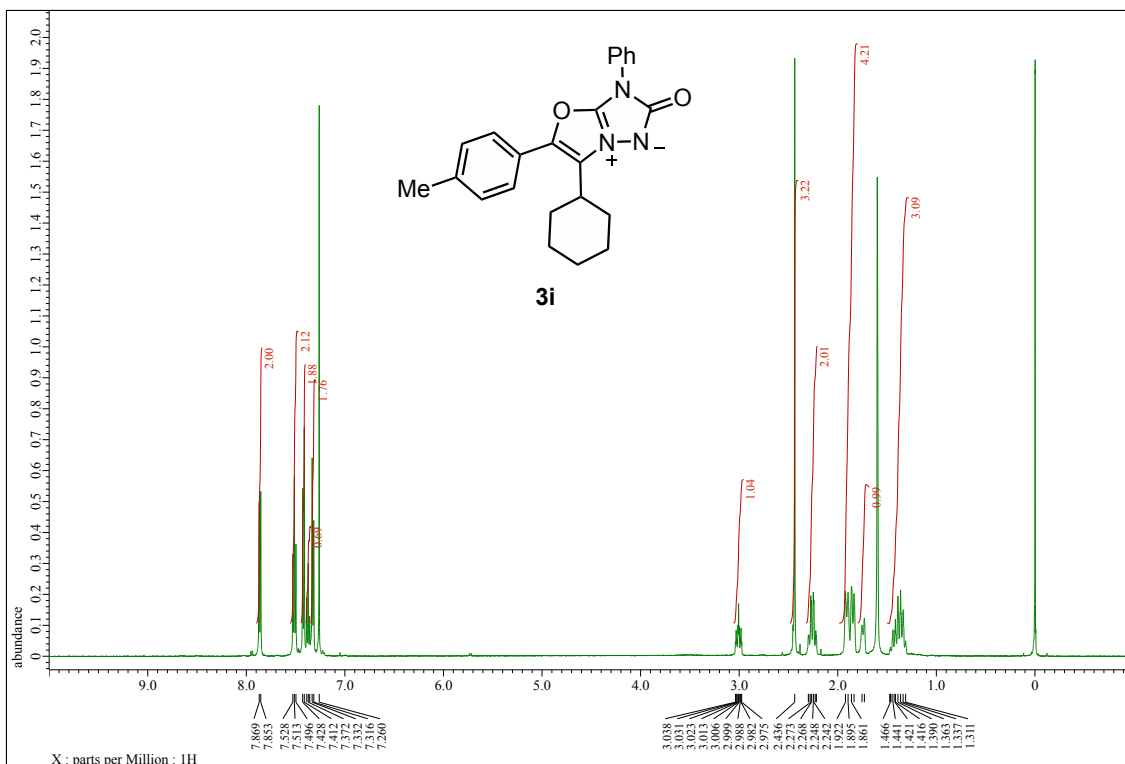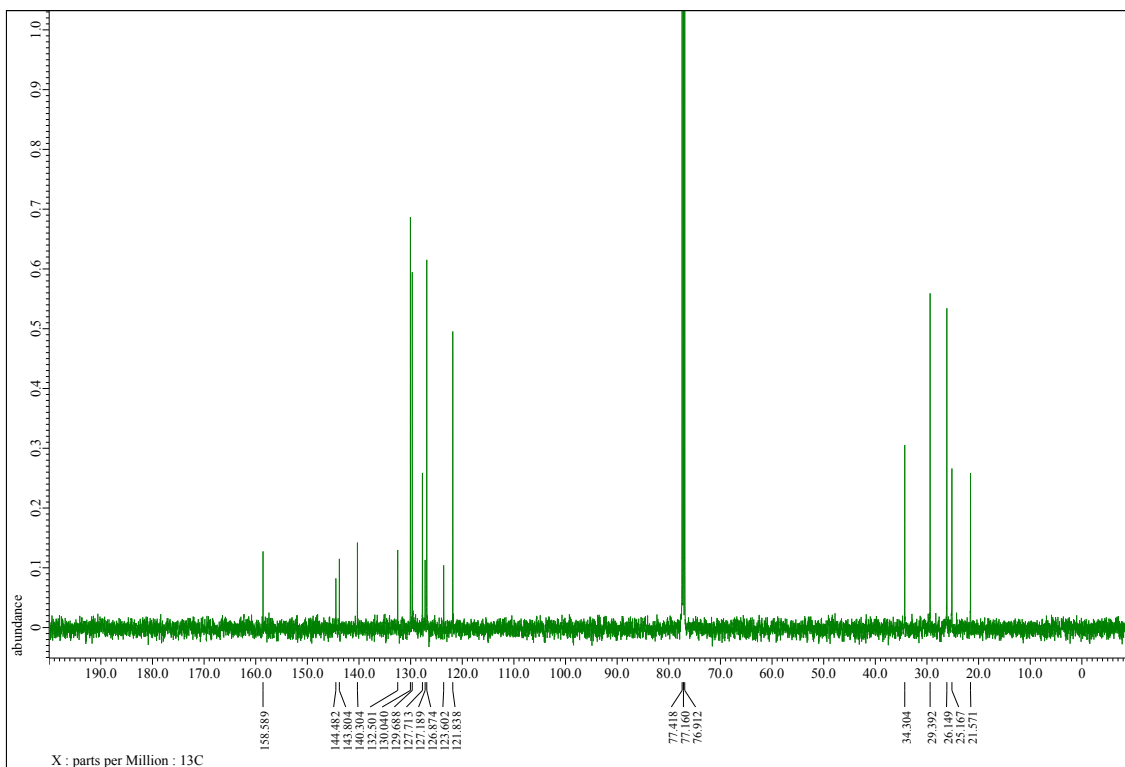



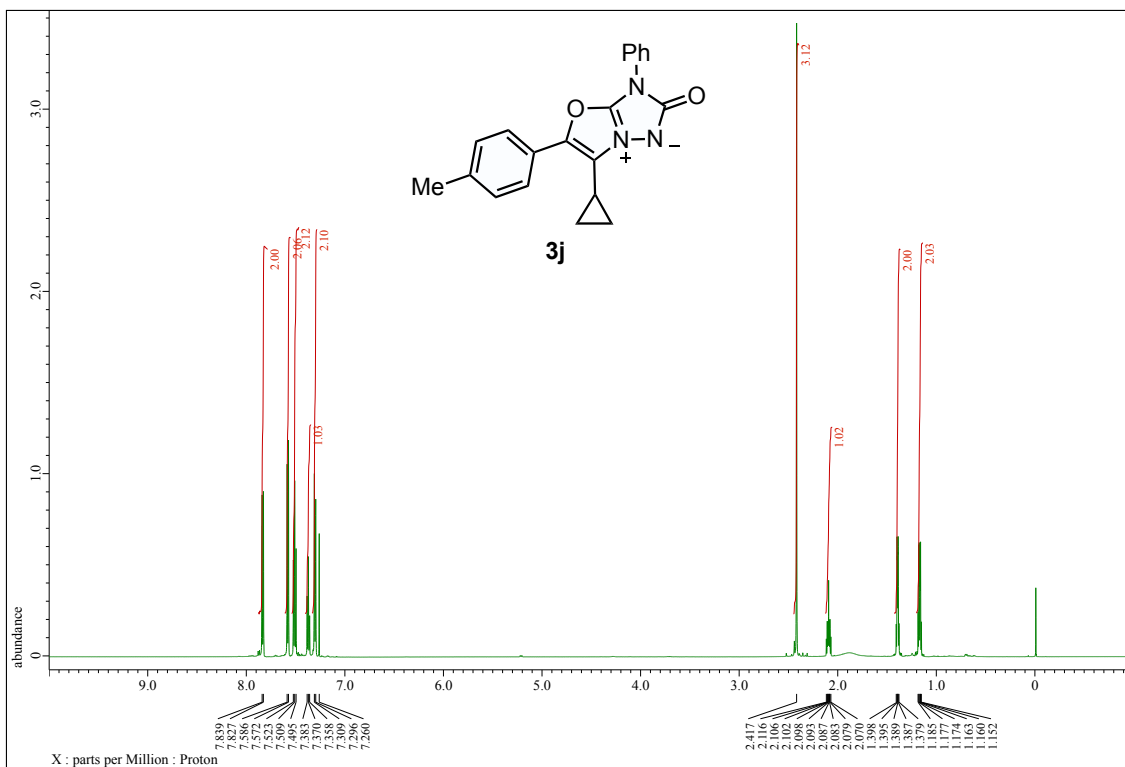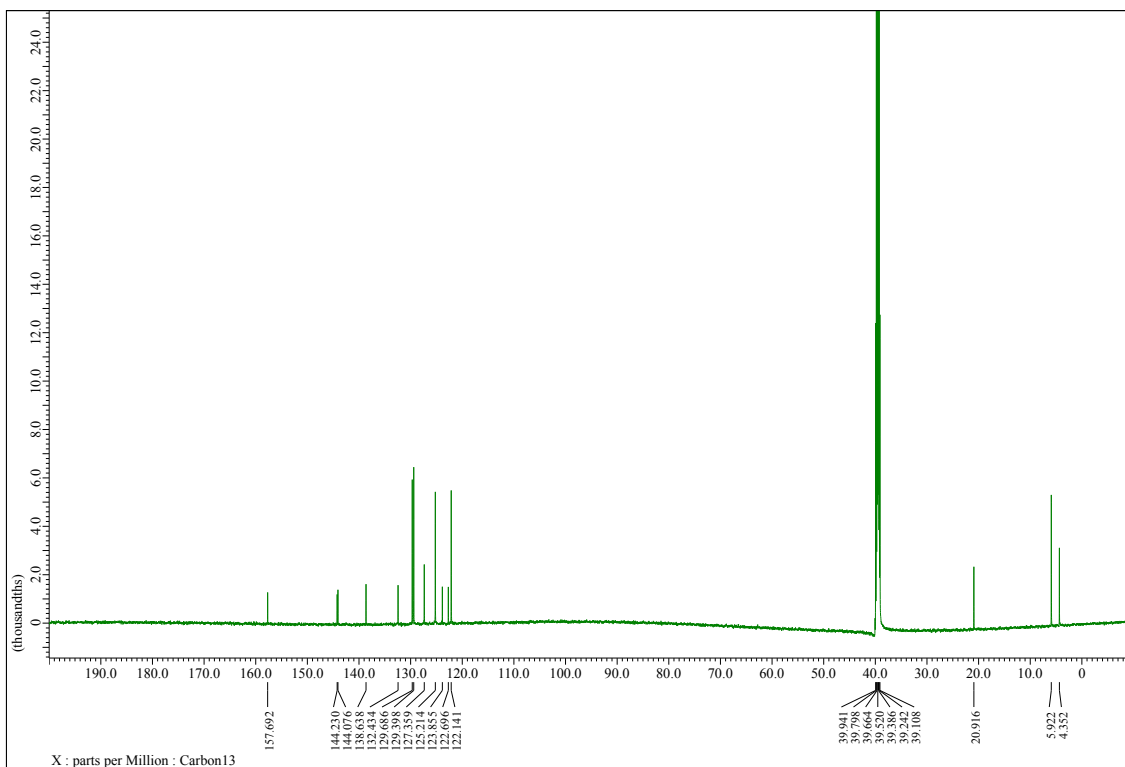

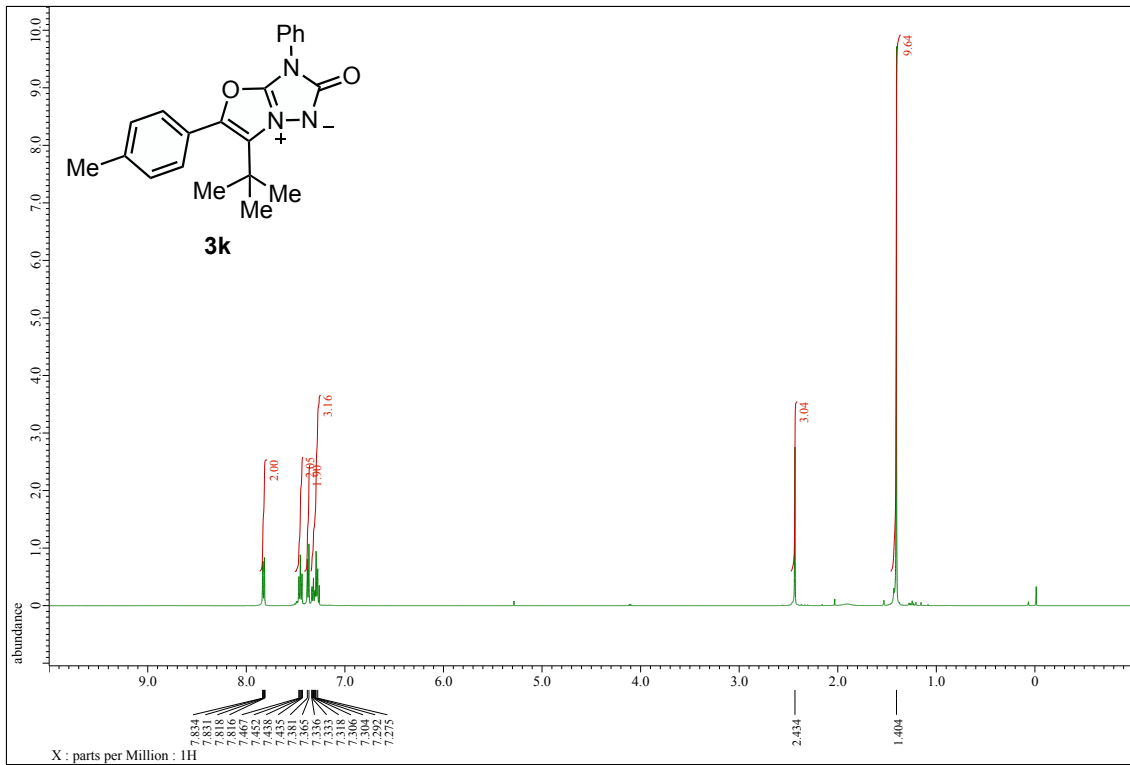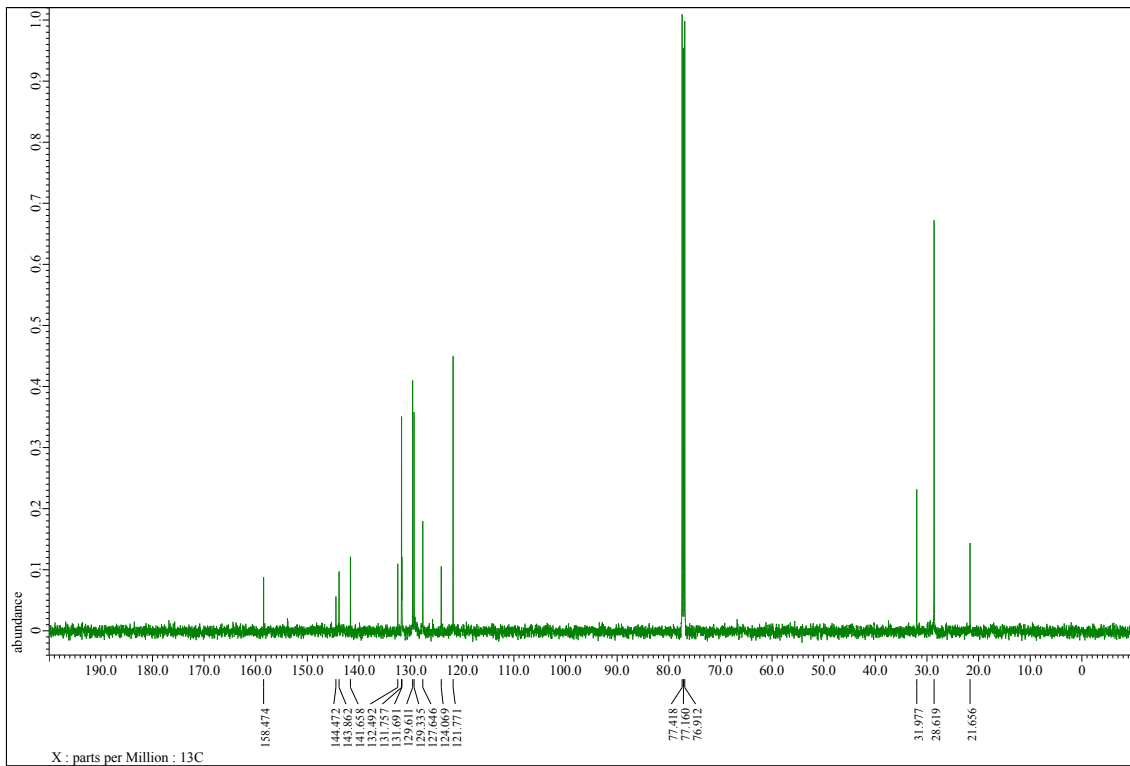

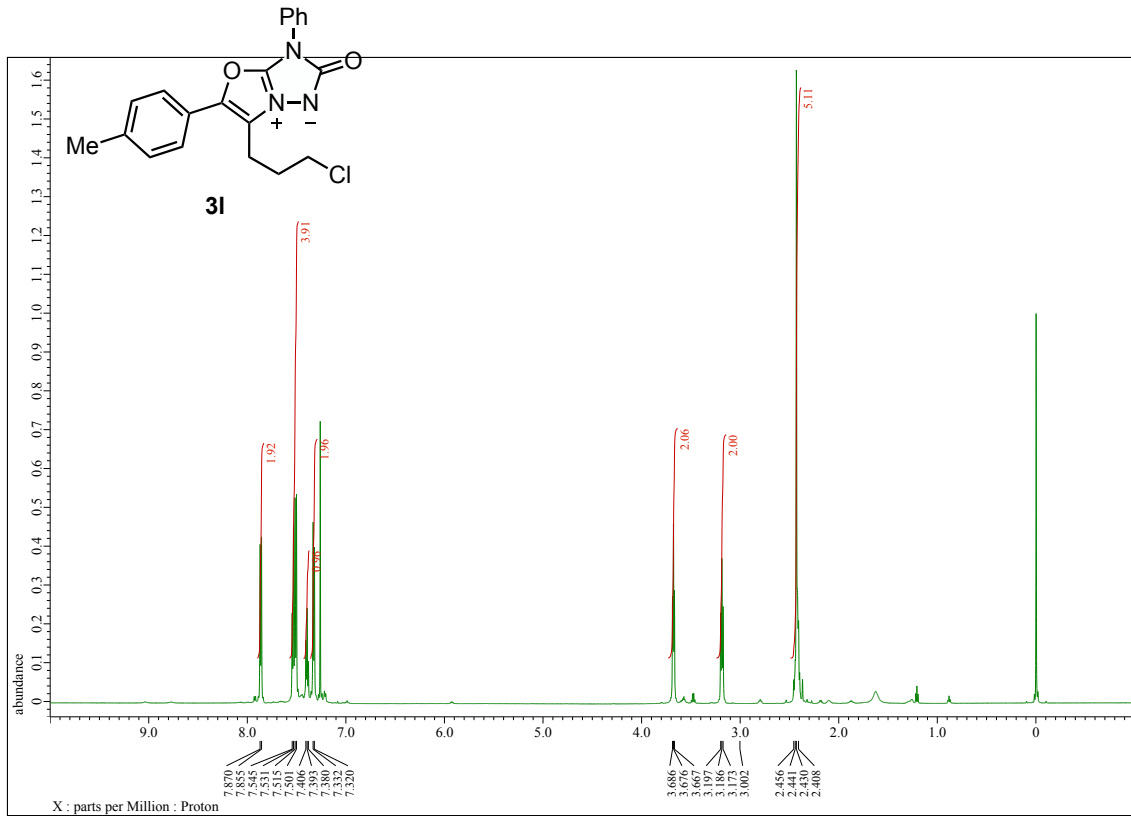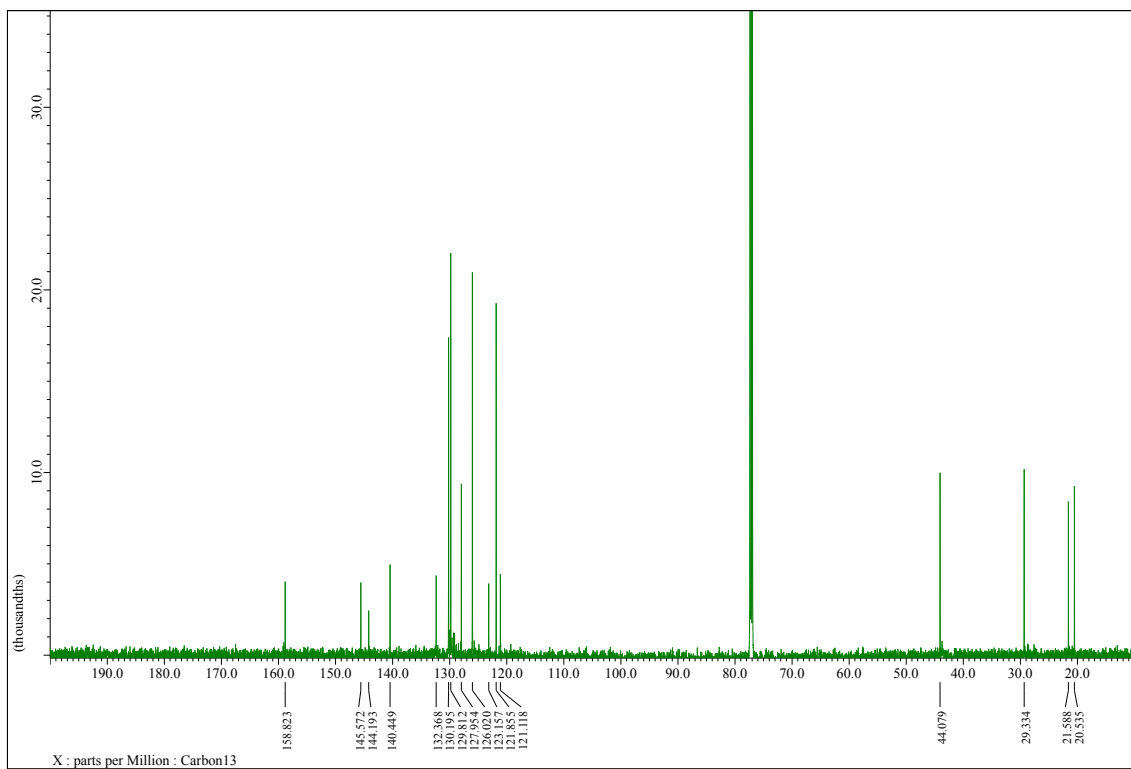

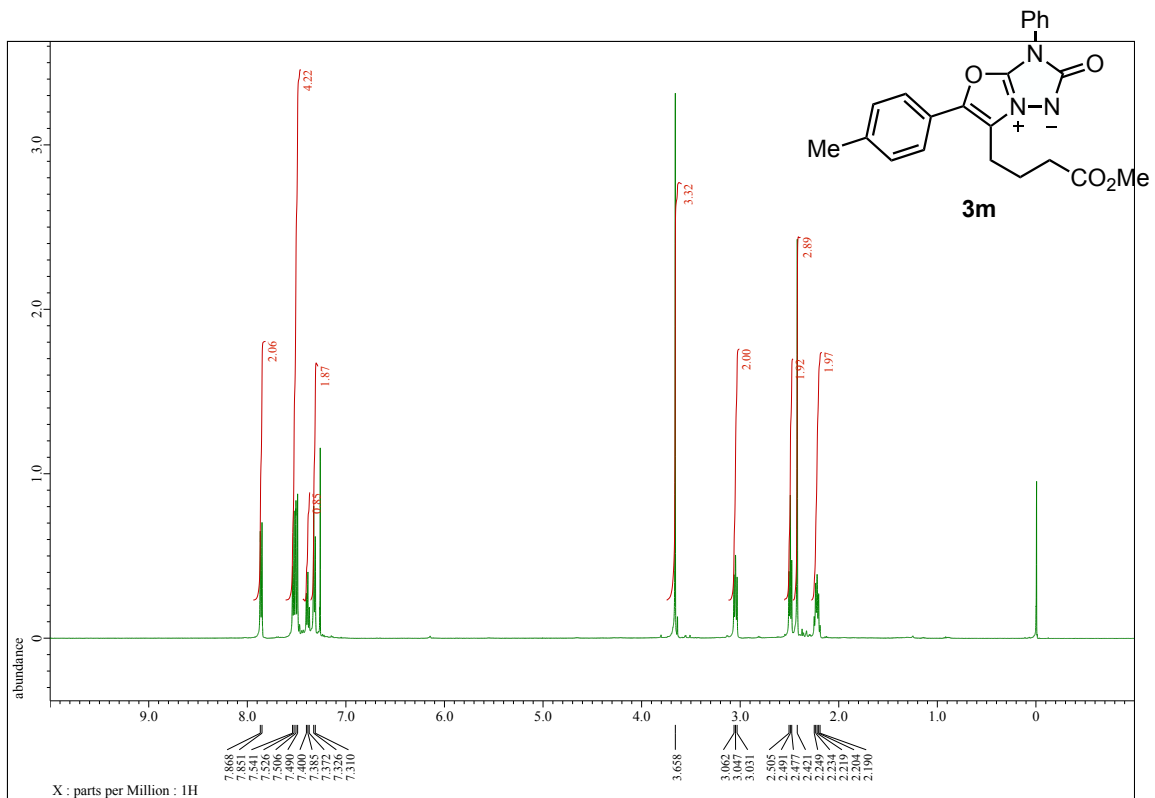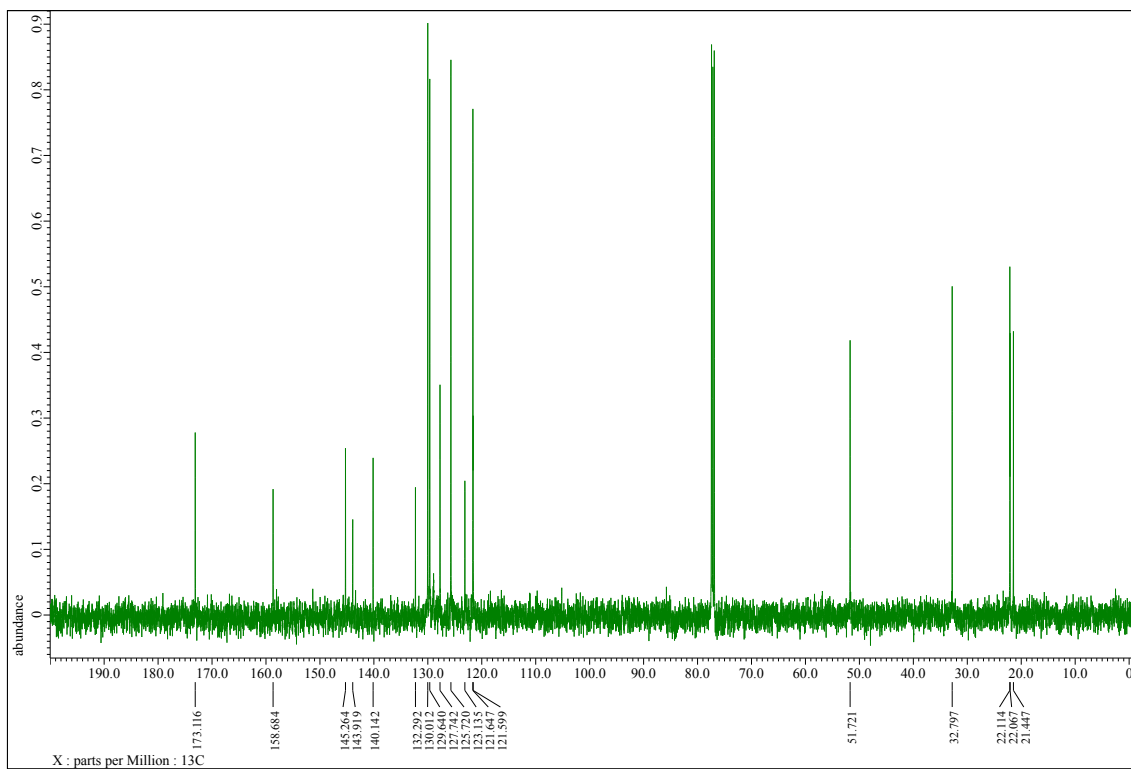

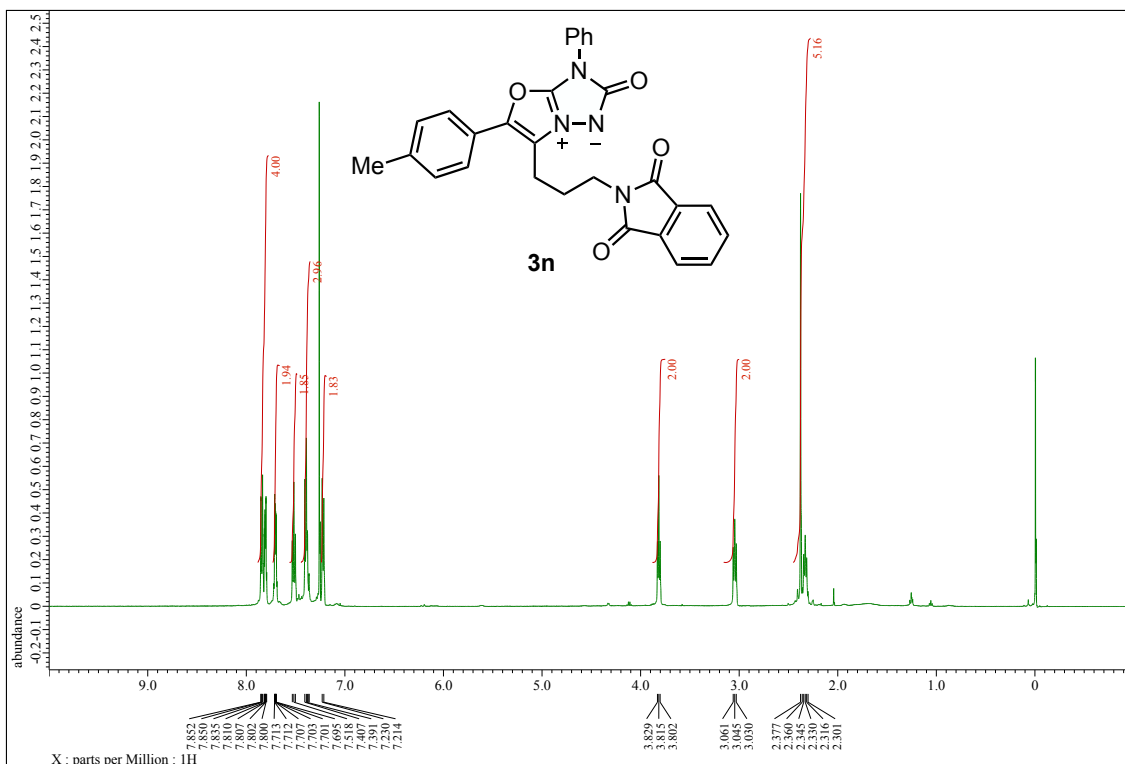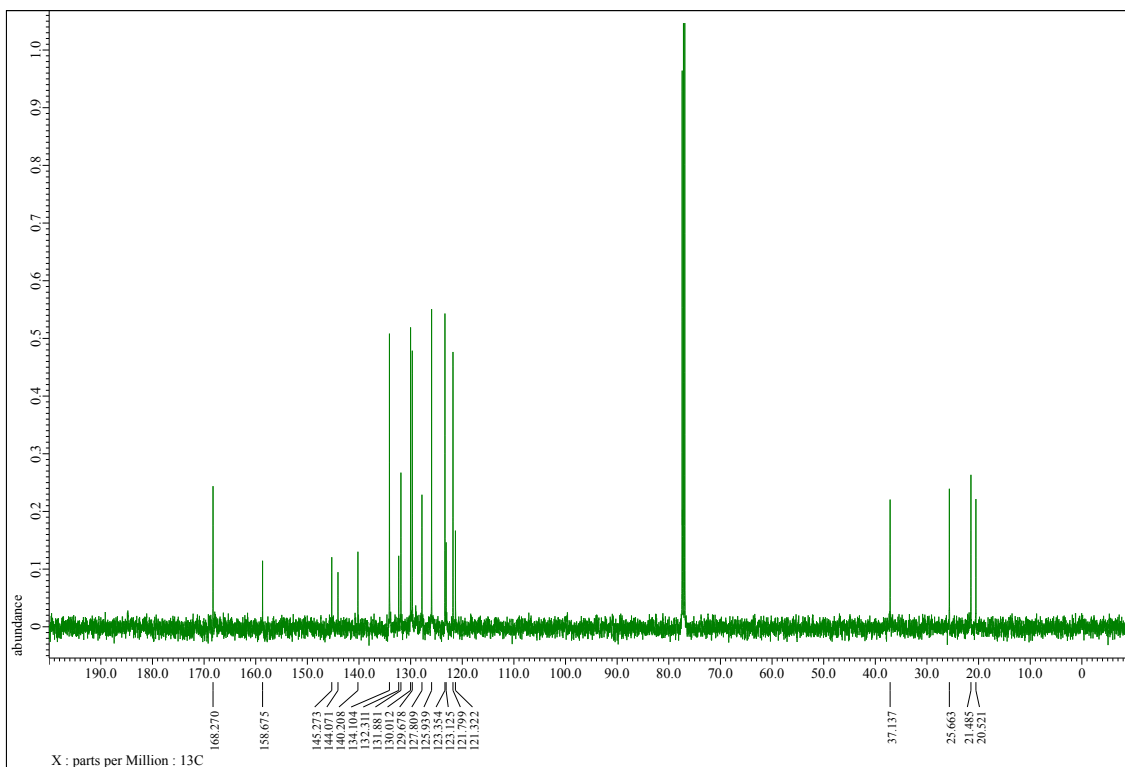

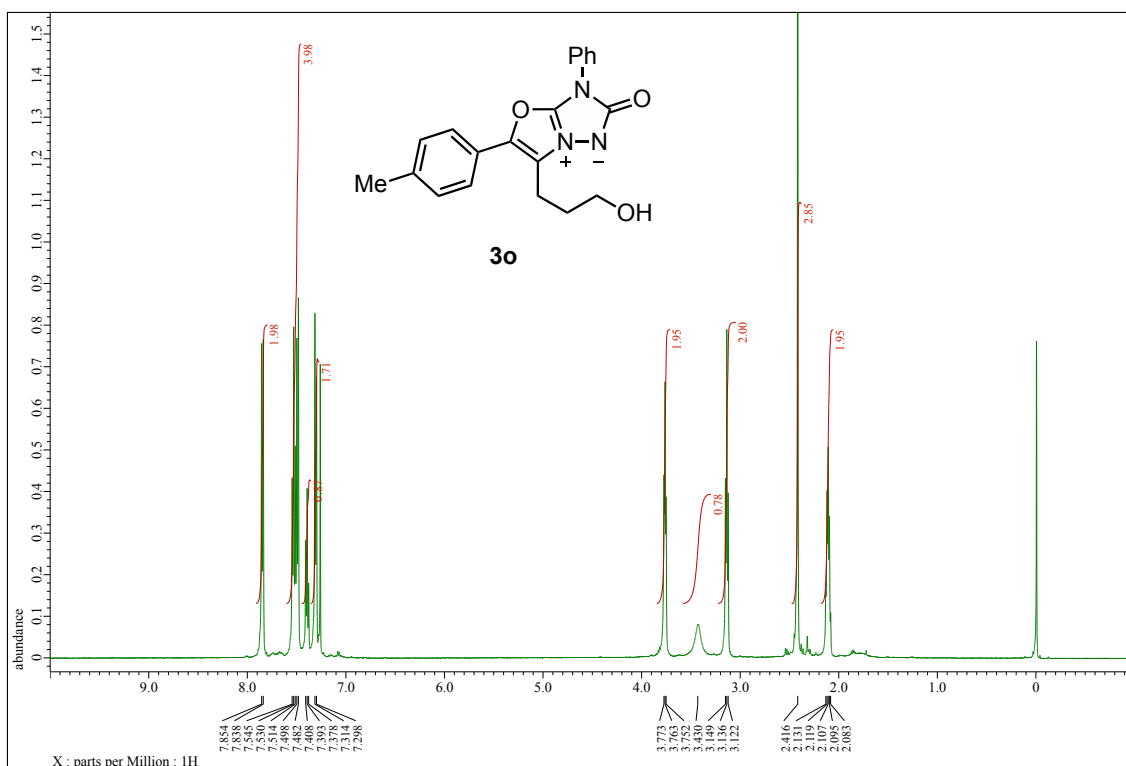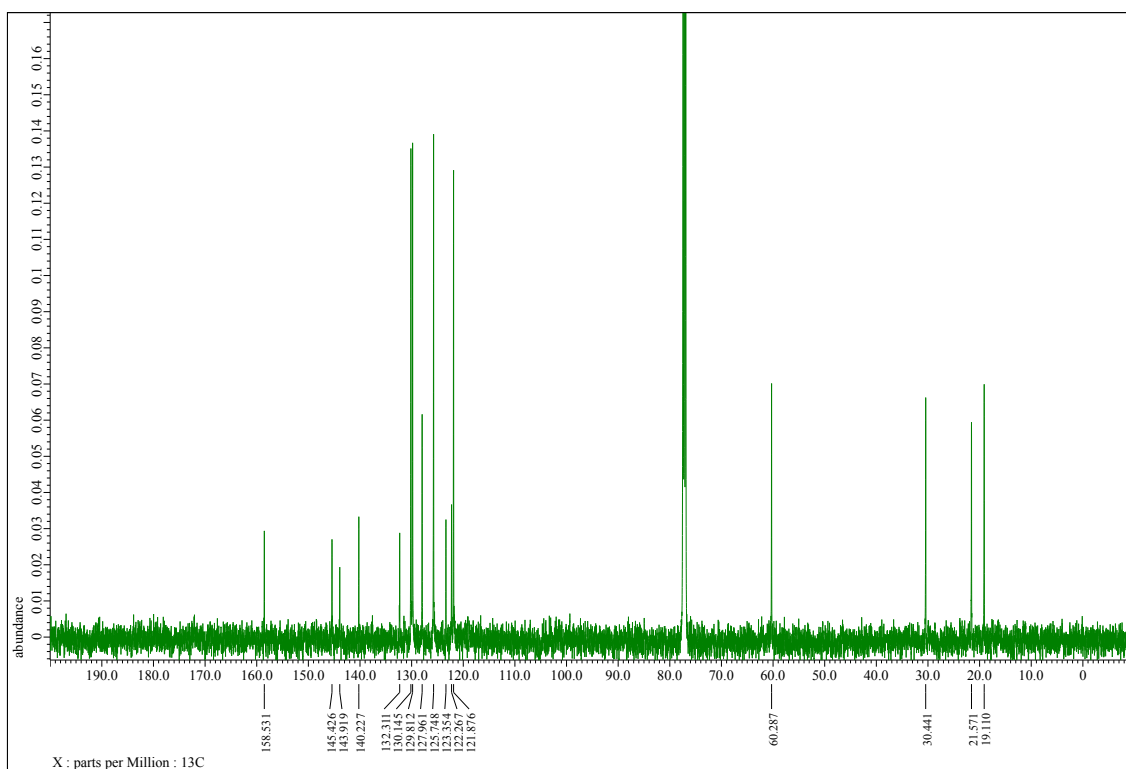

Supplement: d3cc05088b1.pdf [file d3cc05088b1.pdf]
